# Supplementary material for: Binuclear coordination complex of open merocyanine form of photochromic spiropyran with MnII(hfac)2 having high spin (S = 5) ground state
Source: Royal Society of Chemistry journal article supplement (doi:10.1039/d3nj00058c), 2023-01-01
Supplement: d3nj00058c1.pdf [file d3nj00058c1.pdf]

## Supplementary Information

**Table S1.** IR spectra of parent compounds and complex **1**.

|                                      | Components                                                                                                                                                                                                                                                                                                                             |                                                                                                                                    | {Mn <sup>II</sup> (hfac) <sub>2</sub> ·(μ <sub>2</sub> -TMI-NPS)} <sub>2</sub> ( <b>1</b> )                                                                                                                                                                                                                                                               |
|--------------------------------------|----------------------------------------------------------------------------------------------------------------------------------------------------------------------------------------------------------------------------------------------------------------------------------------------------------------------------------------|------------------------------------------------------------------------------------------------------------------------------------|-----------------------------------------------------------------------------------------------------------------------------------------------------------------------------------------------------------------------------------------------------------------------------------------------------------------------------------------------------------|
|                                      | TMI-NPS                                                                                                                                                                                                                                                                                                                                | Mn <sup>II</sup> (hfac) <sub>2</sub>                                                                                               |                                                                                                                                                                                                                                                                                                                                                           |
| TMI-NPS                              | 456w<br>551w<br>589w<br>687w<br>734s<br>745s<br>753s<br>808s<br>820m<br>862w<br>936m<br>987s<br>1014m<br>1027m<br>1085m<br>1108m<br>1144w<br>1156m<br>1210w<br>1238m<br>1250s<br>1277m<br>1304m<br>1340w<br>1359m<br>1379m<br>1441w<br>1461m<br>1488s<br>1516w<br>1590m<br>1613m<br>1640m<br>2893w<br>2925w<br>2966m<br>3045m<br>3063w |                                                                                                                                    | 459w<br>-<br>583w*<br>-<br>725w<br>749w*<br>756w<br>791w 796w sp<br>804w*<br>857w 867w<br>946w<br>954w 965w<br>1020w<br>1041w<br>1089m 1096m sp*<br>-<br>1149vs*<br>-<br>1206s 1218m<br>-<br>1254s*<br>1285m<br>-<br>1331m<br>1362w<br>1377w<br>-<br>1451m*<br>1478m<br>1504m 1511m<br>1590m 1596m sp<br>1616w<br>1645s<br>-<br>-<br>2963w*<br>-<br>3066w |
| Mn <sup>II</sup> (hfac) <sub>2</sub> |                                                                                                                                                                                                                                                                                                                                        | 525w<br>584m<br>666s<br>740w744w<br>806s<br>1090m<br>1134s<br>1250m<br>1347w<br>1460s<br>1538w<br>1566w<br>1612w<br>1638m<br>2971w | -<br>583w*<br>664w 669w sp<br>749w*<br>804w*<br>1089m 1096m sp*<br>1149vs*<br>1254s*<br>-<br>1451m*<br>1527s<br>1552m<br>-<br>1656m<br>2963w*                                                                                                                                                                                                             |

\*bands are coincided, sp. –split band, w- weak, m- middle, s- strong intensity.

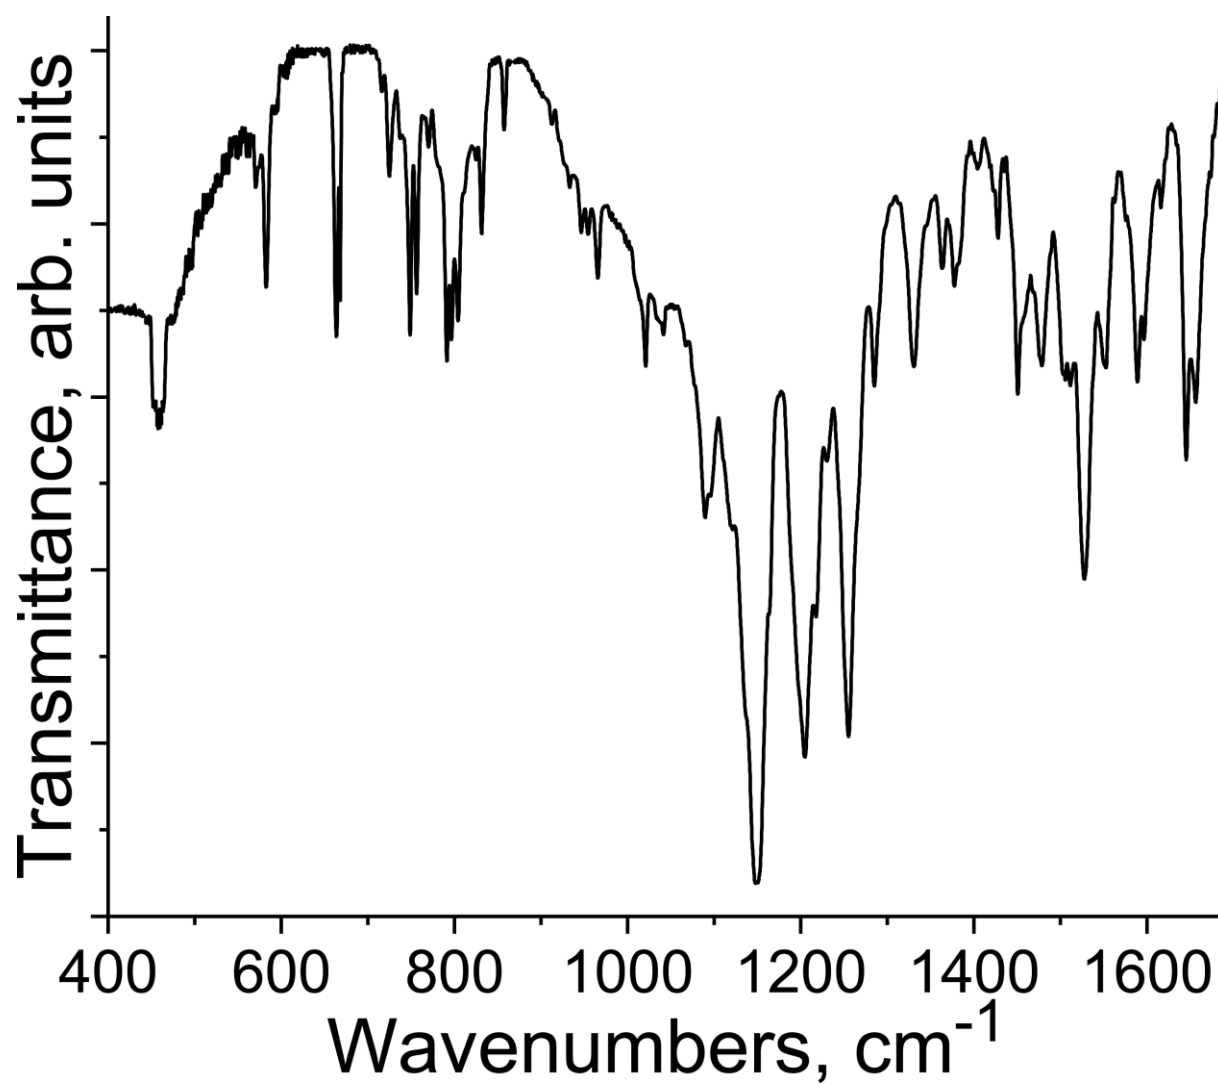

**Fig. S1.** IR-spectrum of  $\{\text{Mn}^{\text{II}}(\text{hfac})_2 \cdot (\mu_2\text{-TMI-NPS})\}_2$  (**1**) measured in KBr pellet prepared in anaerobic conditions.

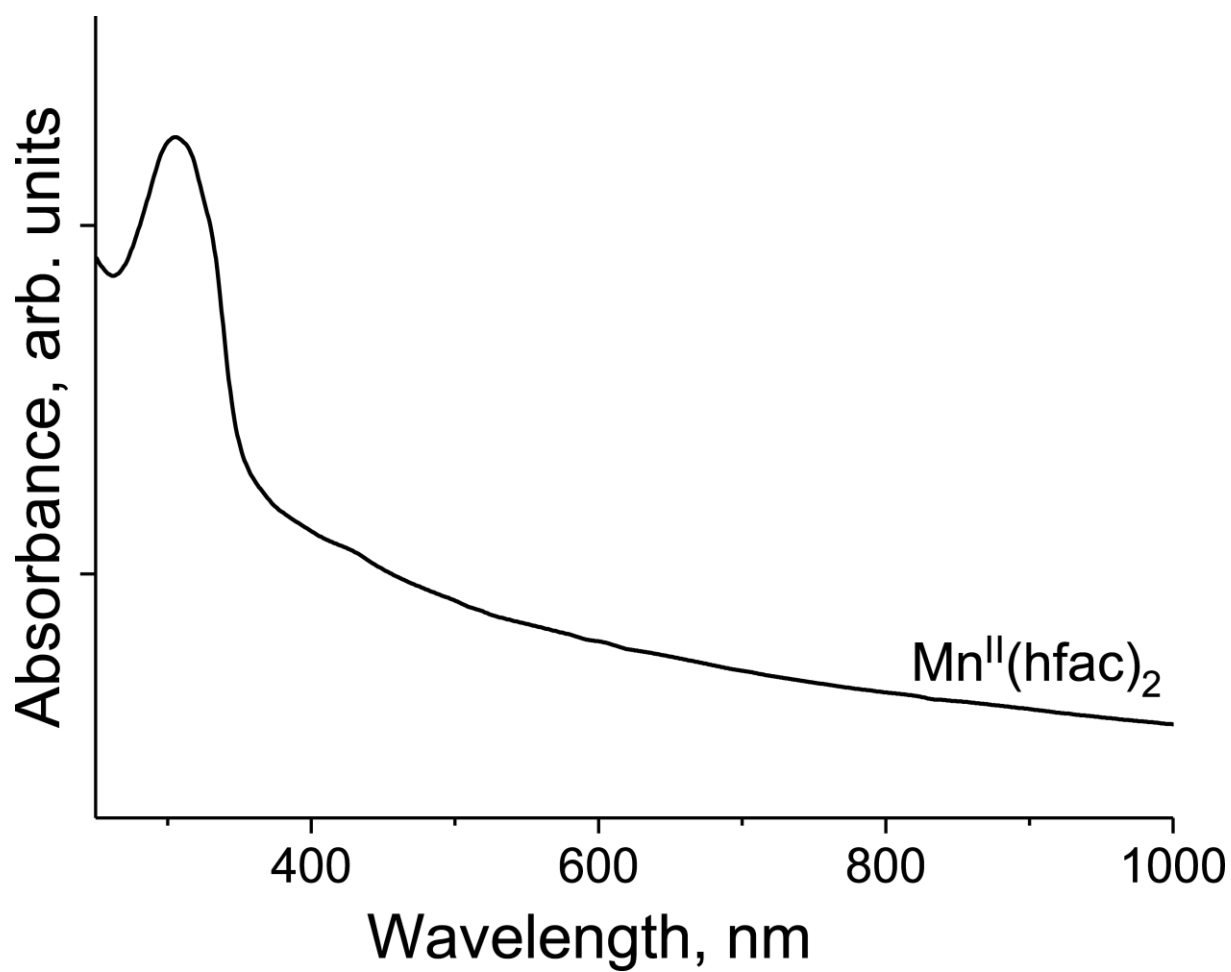

**Fig. S2.** UV-visible-NIR spectrum of starting  $\text{Mn}^{\text{II}}(\text{hfac})_2$  in KBr pellet in the 250-1000 nm range..

Crystal structure of **1**.

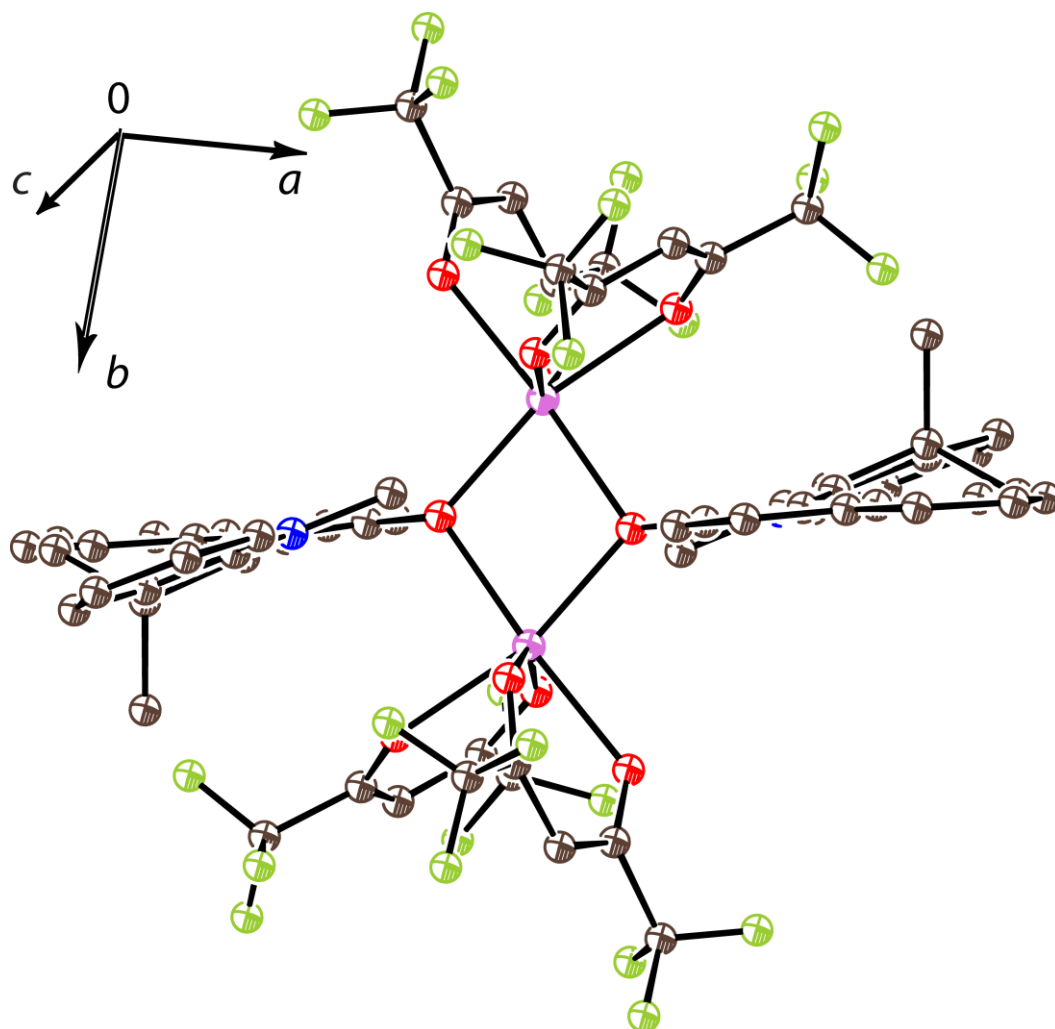

**Fig. S3.** View on the  $\{\text{Mn}^{\text{II}}(\text{hfac})_2(\mu_2\text{-TMI-NPS})\}_2$  dimer in **1** approximately perpendicular to the  $\text{Mn}_2\text{O}_2$  plane. Oxygen is red, nitrogen is blue, fluorine is green, carbon is brown and manganese is pink.

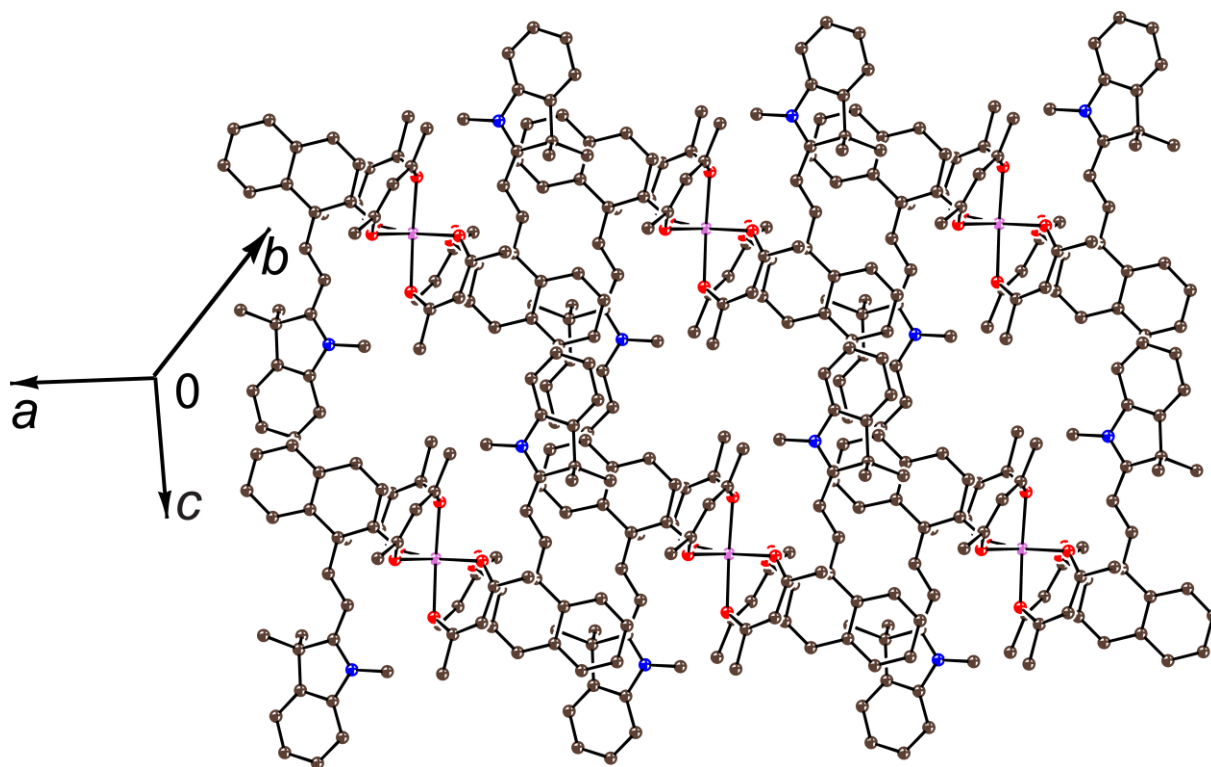

**Fig. S4.** View on the layers composed of the  $\{\text{Mn}^{\text{II}}(\text{hfac})_2 \cdot (\mu_2\text{-TMI-NPS})\}_2$  dimers in **1**. The formation of van der Waals contacts between the TMI-NPS ligands is observed in the chains and between the chains indicating layered packing of the components.

Data of magnetic measurements.

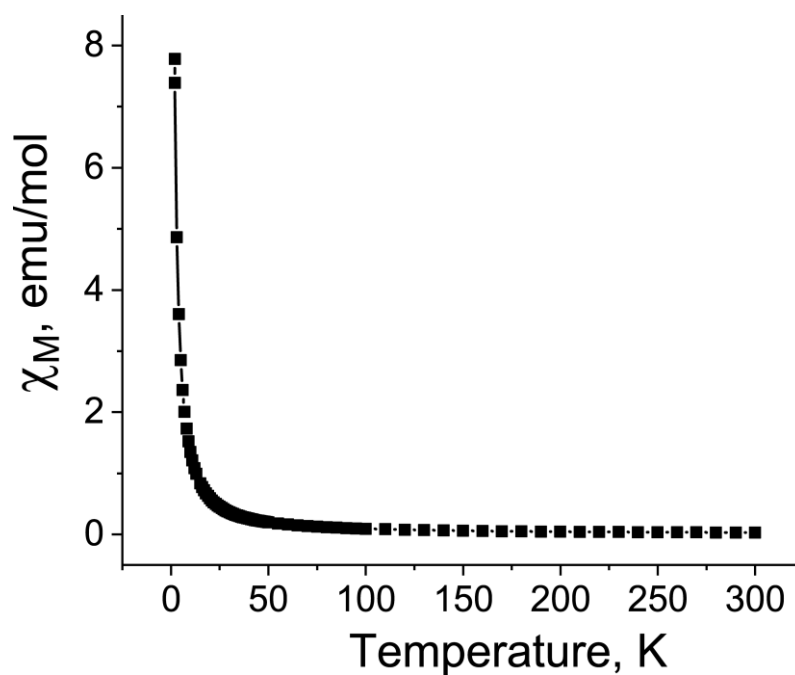

**Fig. S5a.** Data of SQUID measurement for polycrystalline **1**. Temperature dependence of molar magnetic susceptibility is shown in the 1.9-300 K range after subtraction of temperature independent contribution.

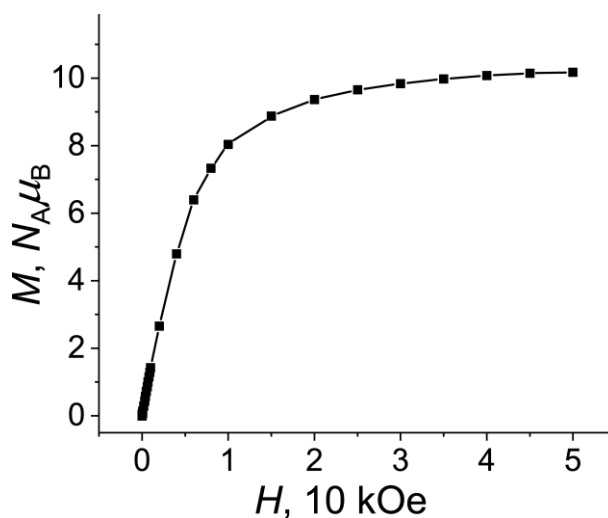

**Fig. S5b.** Magnetization of **1** in  $\mu_B$  vs magnetic field up to 50 kOe (black line is a guide to the eye);

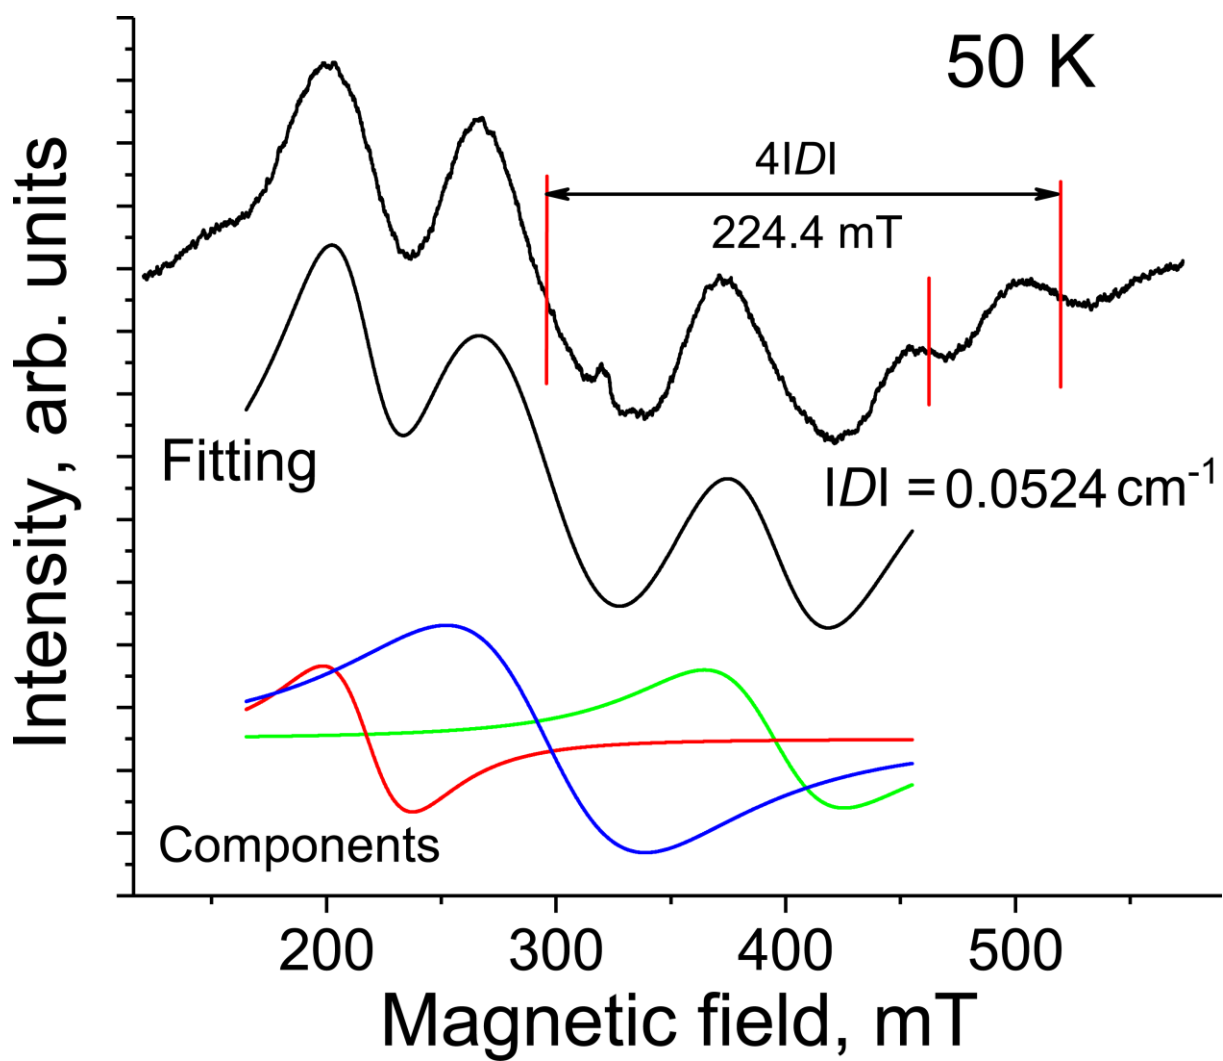

**Fig. S6.** EPR spectrum of polycrystalline **1** at 50 K. Determination of the  $g_1$ ,  $g_2$ , and  $g_3$  values together with zero-field splitting  $|D|$  is shown. Determined values are given in the text.

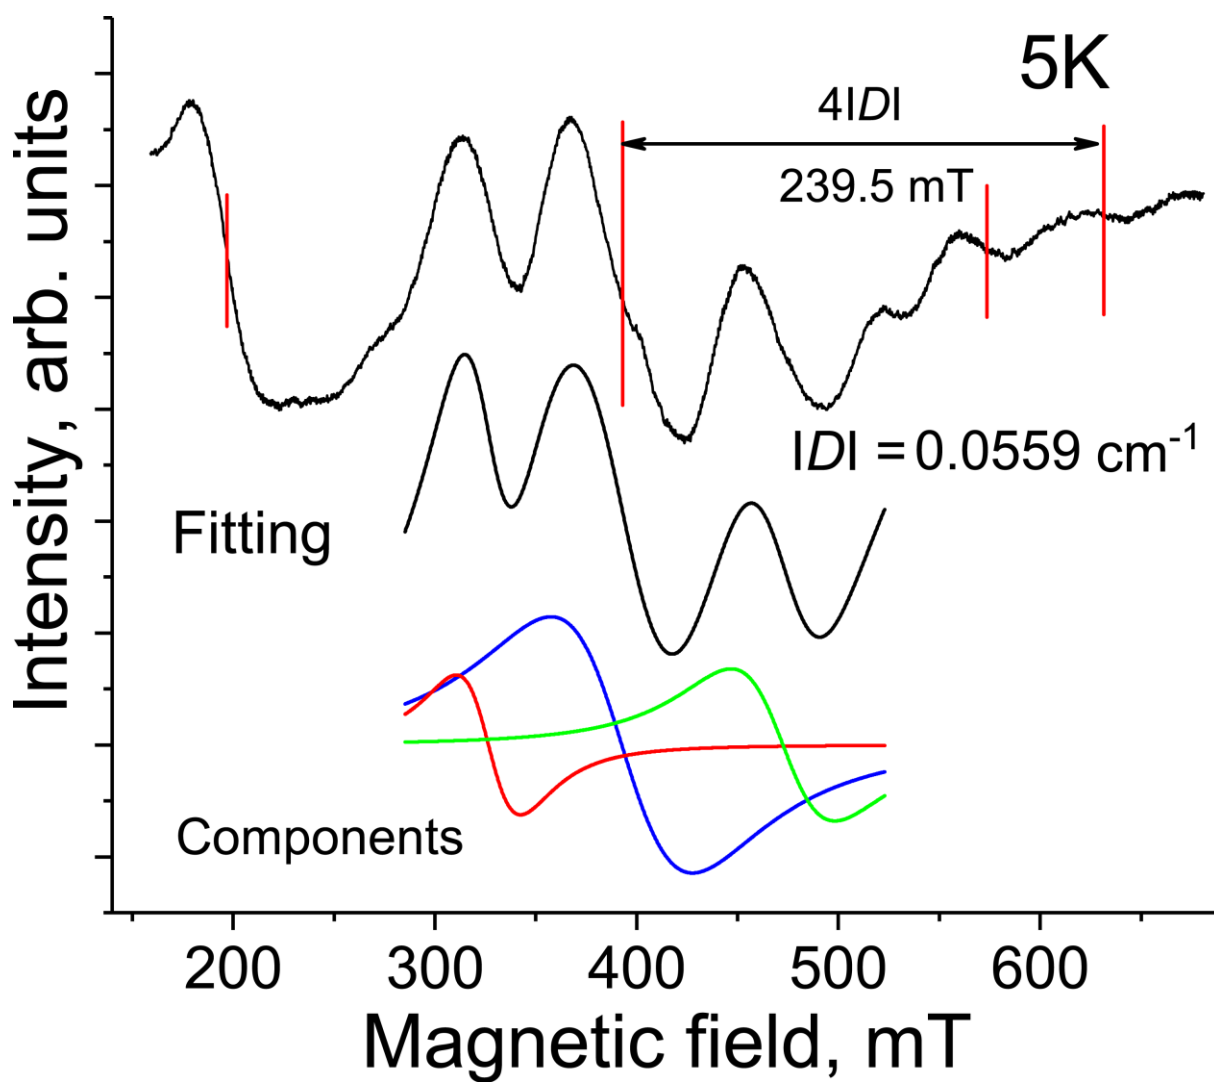

**Fig. S7.** EPR spectrum of polycrystalline **1** at 5 K. Determination of the  $g_1$ ,  $g_2$ , and  $g_3$  values together with zero-field splitting  $|DI|$  is shown. Determined values are given in the text.



## Theoretical calculations

Optimization of the molecular structures was performed using the PBE exchange-correlation functional<sup>[2]</sup> and with the extended basis set Mn: [9s9p8d/5s5p4d], O,N,C : [5s5p2d/3s3p2d], H :[5s1p/3s1p] for the valence electrons and the SBK pseudopotential<sup>[3]</sup> implemented in the **PRIRODA** package<sup>[4]</sup>. The Hirschfeld method<sup>[5]</sup> was used to calculate atomic charges. Electronic spectra are estimated using results of TDDFT calculations with Gaussian widening of lines with half width 20 nm. Energetic effects are given at  $T = 0$  taking into account the contribution of zero point vibration energies. All calculations were performed at Joint Supercomputer Center of the Russian Academy of Sciences.

The value of the exchange parameter  $J$  is determined by the set of matrix elements between magnetic orbitals localized at centers a and b:

$$\left\langle a_i(1)b_j(2) \left| h(1) + h(2) + \frac{1}{r_{12}} \right| b_j(1)a_i(2) \right\rangle = 2\langle a_i | b_j \rangle \langle a_i | h | b_j \rangle + \left\langle a_i(1)b_j(2) \left| \frac{1}{r_{12}} \right| b_j(1)a_i(2) \right\rangle$$

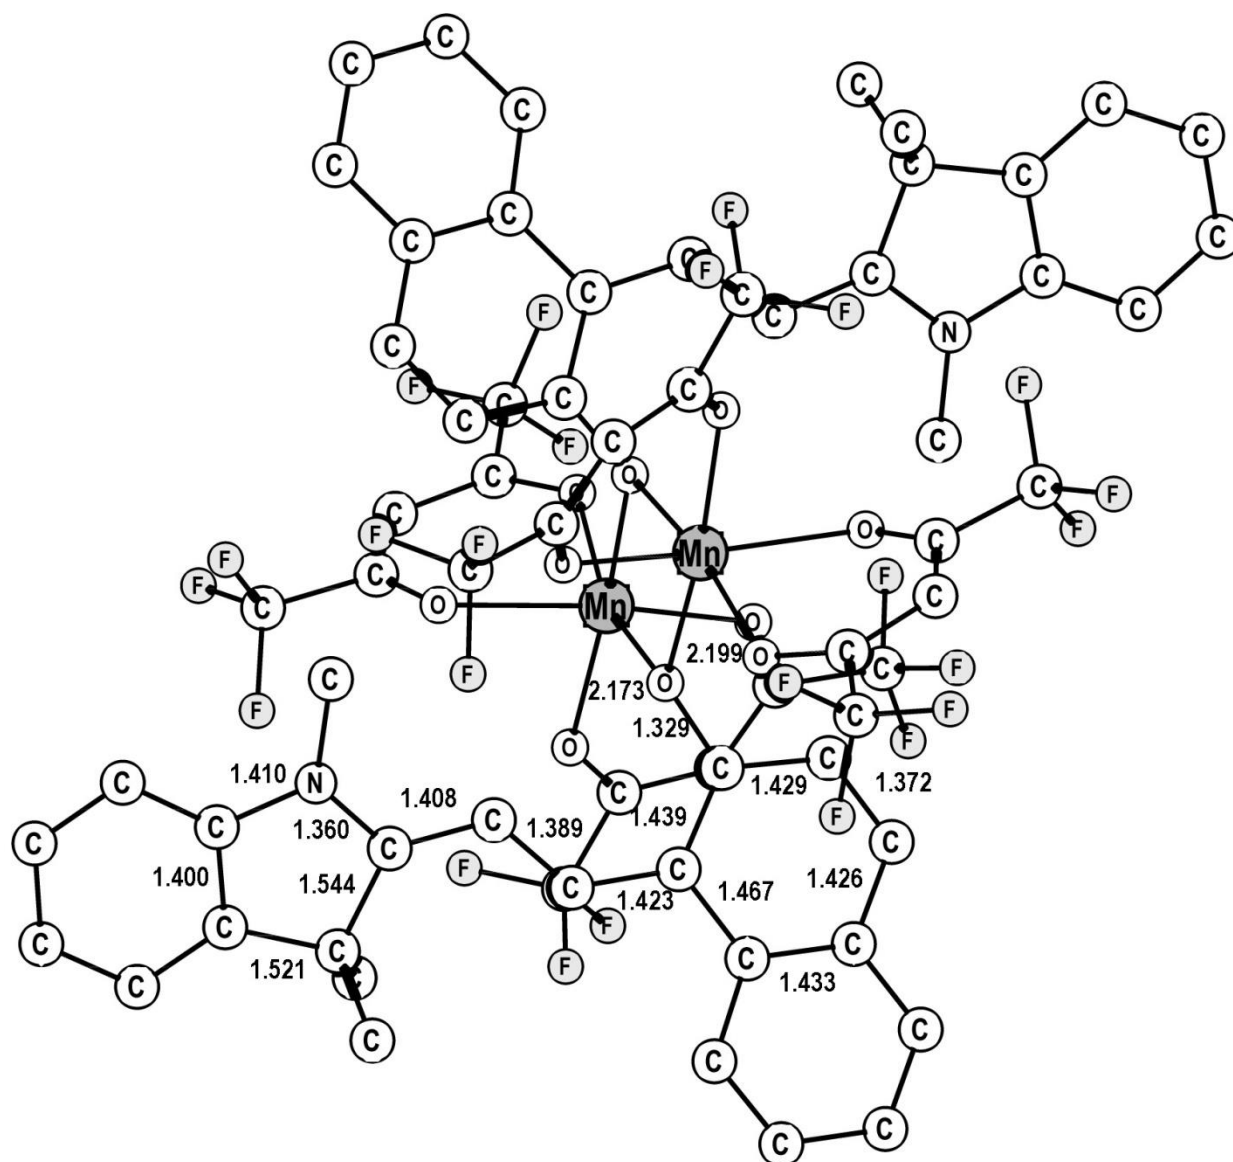

**Fig S9.** Optimized structure of the  $\{\text{Mn}^{\text{II}}(\text{hfac})_2 \cdot (\mu_2\text{-TMI-NPS})\}_2$  dimer.

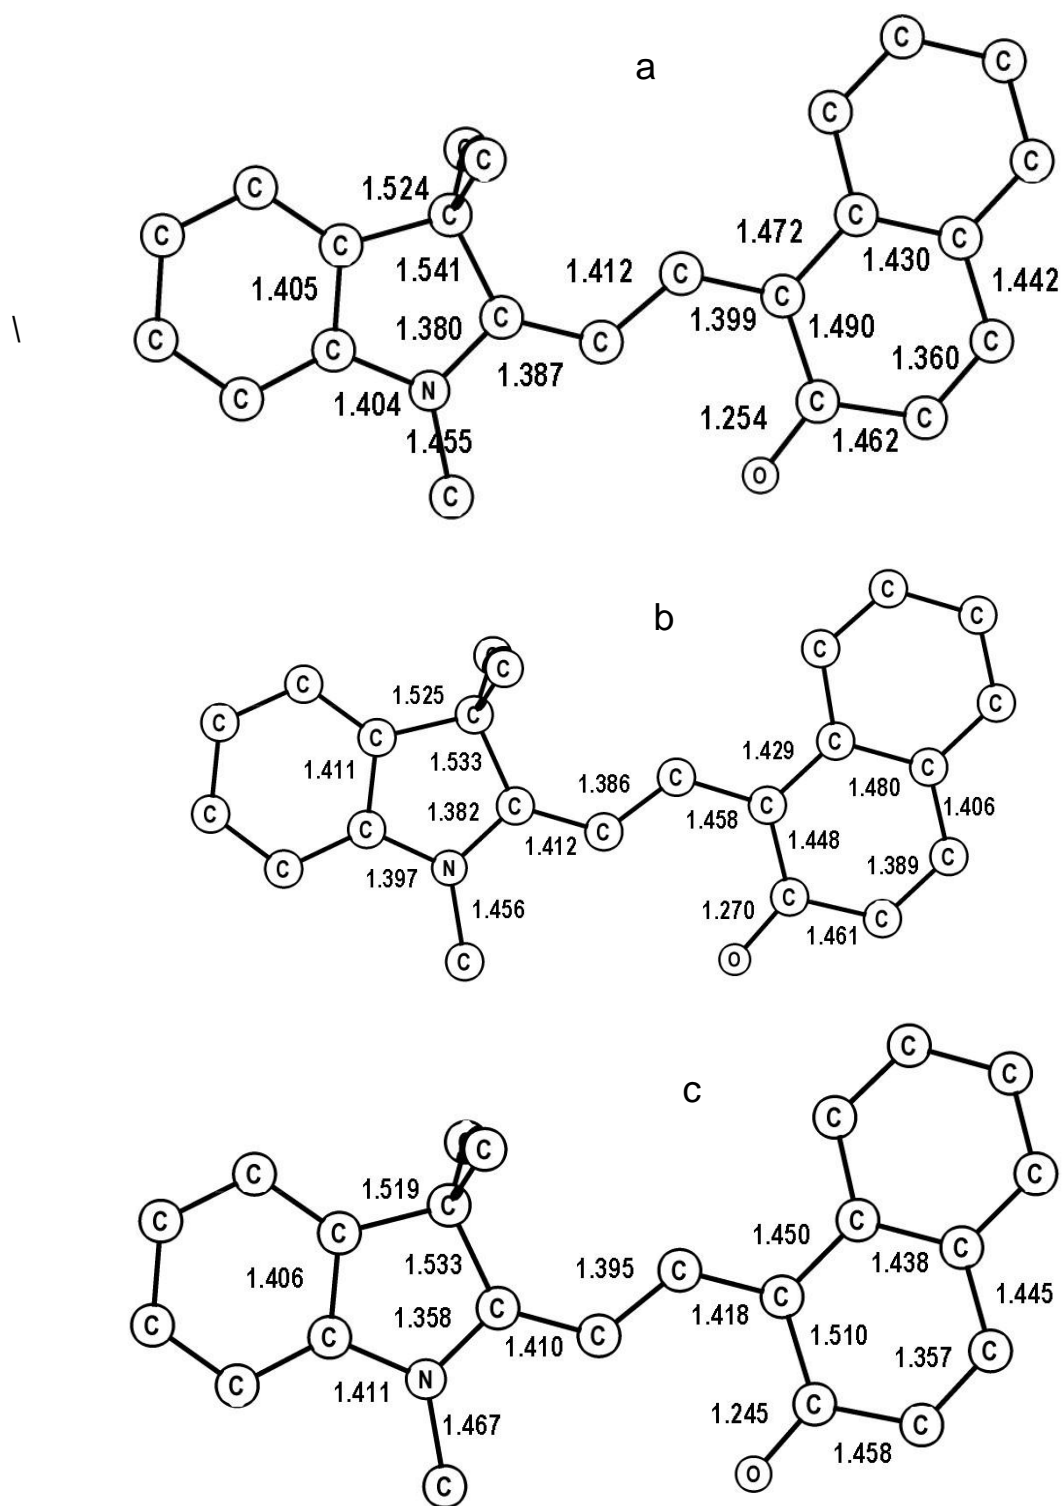

**Fig. S10.** Optimized structure of: (a) free TMI-NPS ligand in the open form; (b) the excited free TMI-NPS ligand in the open form. Excitation corresponds to intense transition for this ligand observed in visible range; (c) free ligand in the open form in the radical cation TMI-NPS<sup>+</sup> state.

## References.

- [1] Sheldrick, G. M., *Acta Crystallogr., Sect. A: Fundam. Crystallogr.* 2008, **64**, 112-122.
- [2] J. P. Perdew, K. Burke, M. Ernzerhof, *Phys. Rev. Lett.* **1996**, 77, 3865-3868.
- [3] Stevens, W. J.; Basch, H., Krauss, M. J. *Chem. Phys.*, 1984, 81, 6026
- [4] D. N. Laikov, *Chem. Phys. Lett.*, **1997**, 281, 151 - 156.
- [5] F. L. Hirshfeld, *Theor. Chim. Acta* **1977**, 44, 129-138.

## Cartesian coordinates of the calculated structures

TMI-NPS open form

|   |             |             |             |
|---|-------------|-------------|-------------|
| 8 | 2.53449485  | -2.23310386 | 1.26015346  |
| 7 | 1.22980962  | 0.02400531  | -2.54086225 |
| 6 | 1.79233919  | -2.01304483 | 2.24613454  |
| 6 | 2.14908831  | -2.57459515 | 3.54773815  |
| 1 | 3.07360874  | -3.15343465 | 3.57558022  |
| 6 | 1.37873052  | -2.39578309 | 4.65389162  |
| 1 | 1.67703620  | -2.83490802 | 5.61061148  |
| 6 | 0.14833284  | -1.64477035 | 4.61585700  |
| 6 | -0.63072724 | -1.51030507 | 5.78621095  |
| 1 | -0.27108950 | -1.97625263 | 6.70692442  |
| 6 | -1.83059306 | -0.80792860 | 5.77856567  |
| 1 | -2.42438091 | -0.71196528 | 6.68853818  |
| 6 | -2.26955571 | -0.23135093 | 4.57466256  |
| 1 | -3.21489418 | 0.31385758  | 4.54352208  |
| 6 | -1.51238639 | -0.35291851 | 3.41150525  |
| 1 | -1.90834958 | 0.10007574  | 2.50252579  |
| 6 | -0.27857904 | -1.04898226 | 3.38743838  |
| 6 | 0.55286189  | -1.18901582 | 2.18054600  |
| 6 | 0.19060303  | -0.52515050 | 1.00408625  |
| 1 | -0.70073648 | 0.10072054  | 1.06048633  |
| 6 | 0.86325640  | -0.56231410 | -0.23729286 |
| 1 | 1.74949645  | -1.19630108 | -0.26425044 |
| 6 | 0.48937781  | 0.12665558  | -1.38129469 |
| 6 | -0.70058473 | 1.06952589  | -1.64688282 |
| 6 | -0.47558871 | 1.43861038  | -3.10847448 |
| 6 | -1.20554513 | 2.26413110  | -3.95695418 |
| 1 | -2.10385247 | 2.77524837  | -3.60360989 |
| 6 | -0.77264841 | 2.43581110  | -5.28414683 |
| 1 | -1.33587487 | 3.08034918  | -5.95983994 |
| 6 | 0.37847524  | 1.78185059  | -5.74142734 |
| 1 | 0.70576097  | 1.92098581  | -6.77291711 |
| 6 | 1.12498623  | 0.94600852  | -4.89717392 |
| 1 | 2.01758688  | 0.44418168  | -5.27123421 |
| 6 | 0.67812234  | 0.78957748  | -3.58075554 |
| 6 | 2.43197085  | -0.78719222 | -2.65305553 |
| 1 | 3.18018725  | -0.47275459 | -1.91084464 |

|   |             |             |             |
|---|-------------|-------------|-------------|
| 1 | 2.85469366  | -0.67321455 | -3.65613858 |
| 1 | 2.20276528  | -1.84878641 | -2.47763525 |
| 6 | -0.63669217 | 2.33635441  | -0.75787102 |
| 1 | -0.76282166 | 2.08922974  | 0.30446125  |
| 1 | -1.43690886 | 3.03389158  | -1.04623908 |
| 1 | 0.32592084  | 2.85220259  | -0.87619568 |
| 6 | -2.05644611 | 0.33939043  | -1.48159072 |
| 1 | -2.10210617 | -0.55526868 | -2.11734306 |
| 1 | -2.87838099 | 1.00963652  | -1.77347916 |
| 1 | -2.22076301 | 0.02704110  | -0.44193035 |

TMI-NPS open form, excited state  $S = 0$

|   |             |             |             |
|---|-------------|-------------|-------------|
| 8 | 2.54692236  | -2.16913119 | 1.26831189  |
| 7 | 1.23381980  | 0.06618501  | -2.52637335 |
| 6 | 1.76596962  | -1.98824838 | 2.25297627  |
| 6 | 2.08779467  | -2.65522952 | 3.51253686  |
| 1 | 2.99140178  | -3.26833075 | 3.49861976  |
| 6 | 1.31902490  | -2.53736591 | 4.66307078  |
| 1 | 1.60581769  | -3.05802211 | 5.58036261  |
| 6 | 0.15877505  | -1.74339414 | 4.65827671  |
| 6 | -0.63456920 | -1.61667606 | 5.83250268  |
| 1 | -0.31277795 | -2.15337616 | 6.72782967  |
| 6 | -1.77386009 | -0.84337131 | 5.84687266  |
| 1 | -2.37975420 | -0.74844943 | 6.74807141  |
| 6 | -2.15444611 | -0.15978445 | 4.65039019  |
| 1 | -3.05659940 | 0.45572571  | 4.65652508  |
| 6 | -1.41545549 | -0.25380523 | 3.48909740  |
| 1 | -1.76475724 | 0.29479841  | 2.61718315  |
| 6 | -0.21927832 | -1.04388721 | 3.40945002  |
| 6 | 0.57311009  | -1.16741313 | 2.22664757  |
| 6 | 0.16925039  | -0.46620193 | 1.01324169  |
| 1 | -0.74328959 | 0.12519233  | 1.07725103  |
| 6 | 0.83977934  | -0.49039754 | -0.19963704 |
| 1 | 1.74703896  | -1.09940067 | -0.20680915 |
| 6 | 0.46297657  | 0.17900341  | -1.38462632 |
| 6 | -0.73625516 | 1.08435503  | -1.68766615 |
| 6 | -0.48890009 | 1.42857922  | -3.15205409 |
| 6 | -1.21725594 | 2.21962381  | -4.03315664 |

|   |             |             |             |
|---|-------------|-------------|-------------|
| 1 | -2.13438967 | 2.71700887  | -3.70906474 |
| 6 | -0.76144760 | 2.37580000  | -5.35544745 |
| 1 | -1.32472202 | 2.99382432  | -6.05540596 |
| 6 | 0.41635828  | 1.73820160  | -5.77648776 |
| 1 | 0.76126413  | 1.86511148  | -6.80395955 |
| 6 | 1.16337020  | 0.93758772  | -4.90303762 |
| 1 | 2.07489467  | 0.45017930  | -5.24999078 |
| 6 | 0.69354418  | 0.79428789  | -3.58922471 |
| 6 | 2.45528247  | -0.72177508 | -2.60263402 |
| 1 | 3.19015512  | -0.36892123 | -1.86497231 |
| 1 | 2.88321747  | -0.62873726 | -3.60565812 |
| 1 | 2.24748957  | -1.78198870 | -2.39720444 |
| 6 | -0.72598839 | 2.37037107  | -0.81810681 |
| 1 | -0.85205092 | 2.13422067  | 0.24699038  |
| 1 | -1.54807597 | 3.03500758  | -1.12353306 |
| 1 | 0.21943838  | 2.91672233  | -0.93728667 |
| 6 | -2.08531904 | 0.33356261  | -1.52600511 |
| 1 | -2.10722532 | -0.57164659 | -2.14780562 |
| 1 | -2.91569383 | 0.98501837  | -1.83729725 |
| 1 | -2.25458415 | 0.03518723  | -0.48276311 |

TMI-NPS open form, excited state  $S = 1$

|   |             |             |             |
|---|-------------|-------------|-------------|
| 8 | 2.76374563  | -1.66639706 | 1.40640945  |
| 7 | 1.14642376  | -0.04987976 | -2.54700552 |
| 6 | 1.94121088  | -1.67237600 | 2.36878713  |
| 6 | 2.31362499  | -2.29805440 | 3.62329980  |
| 1 | 3.30870674  | -2.74492238 | 3.65020064  |
| 6 | 1.49572513  | -2.29026971 | 4.71939732  |
| 1 | 1.81564884  | -2.74201825 | 5.66146632  |
| 6 | 0.19064918  | -1.70232897 | 4.65185459  |
| 6 | -0.66241519 | -1.72016731 | 5.77620498  |
| 1 | -0.29478510 | -2.17048876 | 6.70122402  |
| 6 | -1.94678333 | -1.18871359 | 5.72171426  |
| 1 | -2.58941647 | -1.21414808 | 6.60329004  |
| 6 | -2.41935842 | -0.62947190 | 4.51446345  |
| 1 | -3.43407614 | -0.23242383 | 4.45747460  |
| 6 | -1.59996561 | -0.59154125 | 3.39700058  |
| 1 | -2.00033014 | -0.17294297 | 2.47456573  |

|   |             |             |             |
|---|-------------|-------------|-------------|
| 6 | -0.26628114 | -1.10167131 | 3.41943181  |
| 6 | 0.60248958  | -1.03846586 | 2.27084656  |
| 6 | 0.18052446  | -0.35377034 | 1.07433837  |
| 1 | -0.65115673 | 0.34093184  | 1.18381611  |
| 6 | 0.76113853  | -0.50298361 | -0.18867186 |
| 1 | 1.57114286  | -1.22981527 | -0.24128901 |
| 6 | 0.43172102  | 0.17606403  | -1.36998408 |
| 6 | -0.65828509 | 1.21813950  | -1.65087762 |
| 6 | -0.44905785 | 1.47569320  | -3.13899785 |
| 6 | -1.12790516 | 2.31304621  | -4.01641385 |
| 1 | -1.96339434 | 2.92539520  | -3.66982689 |
| 6 | -0.72712655 | 2.36665744  | -5.36447378 |
| 1 | -1.25206584 | 3.02058549  | -6.06163878 |
| 6 | 0.34319324  | 1.58025492  | -5.81592653 |
| 1 | 0.64185288  | 1.62587159  | -6.86442847 |
| 6 | 1.03868384  | 0.72994678  | -4.94680954 |
| 1 | 1.86140672  | 0.11787982  | -5.31694297 |
| 6 | 0.62906080  | 0.69411251  | -3.60514363 |
| 6 | 2.26979324  | -0.96520020 | -2.66255133 |
| 1 | 2.94623363  | -0.84699115 | -1.80590479 |
| 1 | 2.82558014  | -0.74126728 | -3.57971577 |
| 1 | 1.92968154  | -2.01248704 | -2.69671086 |
| 6 | -0.43103261 | 2.51976832  | -0.83738680 |
| 1 | -0.52202923 | 2.33646462  | 0.24154233  |
| 1 | -1.17806465 | 3.27582780  | -1.12227943 |
| 1 | 0.56787862  | 2.93383754  | -1.03061416 |
| 6 | -2.08077280 | 0.65900301  | -1.39266251 |
| 1 | -2.25618113 | -0.25539399 | -1.97557481 |
| 1 | -2.83633573 | 1.40363730  | -1.68453305 |
| 1 | -2.22929703 | 0.42107314  | -0.33096416 |

TMI-NPS<sup>•+</sup> radical-cation, open form, charge = +1,  $S = 1/2$

|   |            |             |             |
|---|------------|-------------|-------------|
| 8 | 2.52588204 | -2.18820250 | 1.26570536  |
| 7 | 1.18912889 | 0.00635034  | -2.52190369 |
| 6 | 1.81503310 | -1.98179435 | 2.26690167  |
| 6 | 2.21284310 | -2.51475213 | 3.56488576  |
| 1 | 3.15481609 | -3.06294097 | 3.58781963  |
| 6 | 1.44525962 | -2.33935219 | 4.67052304  |



1 1.76082274 -2.74856964 5.63320892  
6 0.18350825 -1.63623413 4.62019286  
6 -0.59378665 -1.51657045 5.78472030  
1 -0.21863830 -1.94604807 6.71537051  
6 -1.82977920 -0.86723686 5.76298395  
1 -2.42166181 -0.78543887 6.67521566  
6 -2.31200436 -0.33045273 4.55582104  
1 -3.28450621 0.16177999 4.52781822  
6 -1.55665110 -0.43200967 3.39427858  
1 -1.97781748 -0.02198331 2.47733966  
6 -0.28410749 -1.07061413 3.38355270  
6 0.53817050 -1.17917301 2.19359832  
6 0.16173032 -0.50856911 1.00246824  
1 -0.71757591 0.13056491 1.07040978  
6 0.82129270 -0.56910914 -0.22508381  
1 1.69267751 -1.22208873 -0.26565294  
6 0.45408785 0.13795257 -1.38789066  
6 -0.70777537 1.10273185 -1.65042960  
6 -0.47407365 1.45938138 -3.10845212  
6 -1.17883035 2.29750529 -3.96653752  
1 -2.06525928 2.83766866 -3.63003990  
6 -0.72557822 2.43896667 -5.28851464  
1 -1.26541872 3.09187557 -5.97493812  
6 0.41334740 1.75156863 -5.74143315  
1 0.74447710 1.87704304 -6.77243658  
6 1.13254466 0.90593917 -4.89095061  
1 2.01273924 0.37732389 -5.25546343  
6 0.66395448 0.78065149 -3.57800963  
6 2.38268225 -0.83667749 -2.64651362  
1 3.12657433 -0.55169284 -1.89205940  
1 2.81352513 -0.70165716 -3.64170880  
1 2.11618188 -1.89280207 -2.50880493  
6 -0.60667369 2.37066057 -0.76081482  
1 -0.74527143 2.13106276 0.30126866  
1 -1.39019425 3.08275847 -1.05415376  
1 0.36633525 2.86604408 -0.87900524  
6 -2.08091156 0.39945631 -1.48191004  
1 -2.15222981 -0.49673560 -2.11268035

1 -2.88144920 1.09088167 -1.77857619  
1 -2.25742040 0.10253783 -0.44011933

TMI-NPS closed form,  $S = 0$

8 0.44612266 0.53213173 0.41571522  
7 0.58755429 -0.17981914 -1.86649764  
6 0.06982245 -0.33733070 1.39060013  
6 0.98236871 -0.49614102 2.46387167  
1 1.92706157 0.04755487 2.42766928  
6 0.66028571 -1.32089648 3.52052581  
1 1.36047290 -1.44341009 4.34969357  
6 -0.57561665 -2.02870524 3.55495540  
6 -0.90383542 -2.88596278 4.63932085  
1 -0.18526581 -2.99356840 5.45530377  
6 -2.10434335 -3.57322284 4.66826791  
1 -2.34494019 -4.22850688 5.50670729  
6 -3.02025555 -3.42444874 3.60040517  
1 -3.96606508 -3.96902038 3.61891234  
6 -2.72846143 -2.59642445 2.52835708  
1 -3.45177179 -2.51113467 1.71691989  
6 -1.50679072 -1.87044793 2.46888622  
6 -1.16699255 -0.99537192 1.37828127  
6 -2.03593207 -0.71801371 0.25359969  
1 -3.05585772 -1.10494021 0.25292739  
6 -1.61915712 0.02051530 -0.80056404  
1 -2.28153796 0.20415192 -1.64493255  
6 -0.22548010 0.56031539 -0.90782801  
6 -0.09004760 2.05945201 -1.42189646  
6 1.27461654 2.00567165 -2.09578730  
6 2.13071415 3.02162761 -2.50354905  
1 1.89128221 4.06823175 -2.30134469  
6 3.32086727 2.68823682 -3.17902834  
1 4.00349845 3.47638116 -3.49918334  
6 3.62998133 1.34785545 -3.43528507  
1 4.55677024 1.09659207 -3.95447045  
6 2.77512489 0.31080193 -3.02422202  
1 3.03705004 -0.73052931 -3.21494482  
6 1.59548587 0.65992140 -2.35700198

|   |             |             |             |
|---|-------------|-------------|-------------|
| 6 | 0.80089907  | -1.61003437 | -1.72803566 |
| 1 | 1.61480102  | -1.85149299 | -1.02030329 |
| 1 | 1.05195206  | -2.04568715 | -2.70623713 |
| 1 | -0.12711436 | -2.08036703 | -1.37914849 |
| 6 | -0.20476951 | 3.09010021  | -0.29073334 |
| 1 | -1.17351848 | 3.00241813  | 0.22400312  |
| 1 | -0.14483446 | 4.10515764  | -0.71091975 |
| 1 | 0.59359631  | 2.97474973  | 0.45087489  |
| 6 | -1.15396973 | 2.36238105  | -2.50501146 |
| 1 | -1.14855472 | 1.60811524  | -3.30480703 |
| 1 | -0.93120220 | 3.33643782  | -2.96256689 |
| 1 | -2.16401318 | 2.41667557  | -2.07149915 |

{[Mn(hfac)<sub>2</sub>](TMI-NPS)}<sub>2</sub> dimer, *S* = 5

|    |             |             |             |
|----|-------------|-------------|-------------|
| 25 | -0.24528638 | -1.65913021 | -0.15586152 |
| 9  | -3.53624330 | -4.94992419 | -0.89919873 |
| 9  | -4.73780832 | -3.62133167 | 0.36580453  |
| 9  | -3.94654381 | -5.49380216 | 1.18332281  |
| 9  | 0.00168280  | -3.10285113 | 4.67958220  |
| 9  | -0.37850825 | -5.17572798 | 4.08049648  |
| 9  | 1.47449496  | -4.18542616 | 3.46771447  |
| 9  | 1.90401731  | -5.93602729 | -0.18653329 |
| 9  | 3.44446898  | -4.79254607 | -1.24982813 |
| 9  | 2.13549116  | -6.16144744 | -2.35221188 |
| 9  | -0.66683048 | -3.91754159 | -5.22767254 |
| 9  | -0.52267245 | -1.73406988 | -5.14447790 |
| 9  | -2.31687277 | -2.74837713 | -4.39328530 |
| 8  | -1.28701768 | 0.23162220  | 0.39529205  |
| 8  | -2.11926668 | -2.69464375 | 0.01180524  |
| 8  | 0.02120325  | -2.39676448 | 1.91203525  |
| 8  | 1.10017638  | -3.32067557 | -0.51466020 |
| 8  | -0.64728381 | -1.89406518 | -2.31265215 |
| 7  | -3.49433370 | 1.48714488  | -3.72769341 |
| 6  | 0.14176910  | -3.99931563 | 3.65654252  |
| 6  | -2.17987899 | 0.32333017  | 1.37499073  |
| 6  | -1.74167299 | 0.06109946  | 2.71014453  |
| 1  | -0.69545332 | -0.20313852 | 2.84430494  |
| 6  | -2.58432632 | 0.15120187  | 3.78835180  |

|   |             |             |             |
|---|-------------|-------------|-------------|
| 1 | -2.20667739 | -0.04980190 | 4.79384406  |
| 6 | -3.96045693 | 0.49019836  | 3.62754565  |
| 6 | -4.82835751 | 0.53590388  | 4.74721976  |
| 1 | -4.41364694 | 0.32670576  | 5.73581230  |
| 6 | -6.17423948 | 0.82784500  | 4.59582555  |
| 1 | -6.83704393 | 0.85961404  | 5.46144182  |
| 6 | -6.68114305 | 1.06194108  | 3.30203044  |
| 1 | -7.74502902 | 1.26279765  | 3.16404461  |
| 6 | -5.84559240 | 1.02420268  | 2.19177365  |
| 1 | -6.29922455 | 1.16542577  | 1.21129499  |
| 6 | -4.45548130 | 0.76585481  | 2.31221655  |
| 6 | -3.54280008 | 0.73695495  | 1.16402198  |
| 6 | -4.03147149 | 1.20758432  | -0.08547417 |
| 1 | -4.98098096 | 1.73624502  | -0.02145958 |
| 6 | -3.47232278 | 1.10928400  | -1.35293456 |
| 1 | -2.54958552 | 0.54806078  | -1.47085877 |
| 6 | -4.03987797 | 1.69065014  | -2.50162288 |
| 6 | -5.26100409 | 2.61753557  | -2.64753144 |
| 6 | -5.24268721 | 2.89974951  | -4.14308320 |
| 6 | -6.07787148 | 3.68493474  | -4.93169568 |
| 1 | -6.91186545 | 4.23586498  | -4.49215371 |
| 6 | -5.82788547 | 3.76381813  | -6.31238226 |
| 1 | -6.47111028 | 4.37775597  | -6.94382721 |
| 6 | -4.75656305 | 3.06386631  | -6.88466185 |
| 1 | -4.57335772 | 3.13888634  | -7.95730745 |
| 6 | -3.90869368 | 2.26784529  | -6.10177285 |
| 1 | -3.07336313 | 1.73565885  | -6.55561976 |
| 6 | -4.17848321 | 2.20261483  | -4.73248711 |
| 6 | -2.33066147 | 0.63865196  | -3.96916964 |
| 1 | -1.43791943 | 1.09614065  | -3.52220100 |
| 1 | -2.18589322 | 0.52222056  | -5.04622981 |
| 1 | -2.48785472 | -0.34914562 | -3.52024754 |
| 6 | -5.08706966 | 3.92909615  | -1.84281427 |
| 1 | -5.07753922 | 3.74036510  | -0.76175672 |
| 1 | -5.92186771 | 4.60912667  | -2.06621278 |
| 1 | -4.14971051 | 4.43545863  | -2.10654718 |
| 6 | -6.58155110 | 1.89312709  | -2.27596745 |
| 1 | -6.68982646 | 0.95273863  | -2.83303980 |

1 -7.43390651 2.54026117 -2.52745815  
1 -6.63594309 1.66693758 -1.20356455  
6 -3.66456976 -4.45142917 0.35684059  
6 -2.37904801 -3.67368637 0.76255584  
6 -1.65767940 -4.12365864 1.88522836  
1 -2.00183459 -5.00899345 2.40998429  
6 -0.52689259 -3.44180327 2.36629347  
6 2.16801530 -5.26444600 -1.33317812  
6 1.17760433 -4.07717523 -1.51899599  
6 0.51383935 -3.95906089 -2.75353613  
1 0.67546836 -4.71841753 -3.51162399  
6 -0.33328195 -2.87495835 -3.04351099  
6 -0.96355421 -2.83582032 -4.46725720  
25 0.28038716 1.70080082 0.10985802  
9 3.50846920 5.06858550 0.72128253  
9 4.70422516 3.76833524 -0.57833140  
9 3.83560286 5.61509478 -1.37533177  
9 -0.18702882 3.10614930 -4.71876937  
9 0.19105101 5.18906529 -4.15468068  
9 -1.62330166 4.18274942 -3.45856784  
9 -1.80270561 6.01199746 0.20179082  
9 -3.34431336 4.86546014 1.25909889  
9 -2.01935825 6.20929554 2.37249471  
9 1.03428502 4.08341778 5.07023673  
9 0.71534297 1.91674396 5.11746685  
9 2.54445165 2.74216455 4.23072409  
8 1.33118362 -0.19030220 -0.41027778  
8 2.12583628 2.77051247 -0.13775485  
8 -0.07755751 2.41809144 -1.95443748  
8 -1.06775350 3.34879294 0.51544910  
8 0.77022658 1.95100091 2.24815969  
7 3.41427596 -1.52886053 3.75429142  
6 -0.29712891 4.01055091 -3.69930443  
6 2.24677301 -0.28663119 -1.36891066  
6 1.85525111 0.03488991 -2.70539191  
1 0.82653467 0.35370587 -2.85801758  
6 2.72100436 -0.06430466 -3.76428693  
1 2.37958667 0.18270585 -4.77247774

|   |            |             |             |
|---|------------|-------------|-------------|
| 6 | 4.07406891 | -0.47604762 | -3.58058588 |
| 6 | 4.96376150 | -0.53777159 | -4.68232712 |
| 1 | 4.58235792 | -0.28228672 | -5.67343800 |
| 6 | 6.28897284 | -0.90293573 | -4.51046604 |
| 1 | 6.96882825 | -0.94684988 | -5.36219848 |
| 6 | 6.75283905 | -1.19751532 | -3.21296800 |
| 1 | 7.80098298 | -1.45927245 | -3.05769332 |
| 6 | 5.89559054 | -1.14417284 | -2.12010399 |
| 1 | 6.32005541 | -1.33956934 | -1.13604258 |
| 6 | 4.52394795 | -0.80859193 | -2.26195002 |
| 6 | 3.58689077 | -0.75825129 | -1.13341260 |
| 6 | 4.03168910 | -1.25313707 | 0.12325098  |
| 1 | 4.96799720 | -1.80623011 | 0.07868075  |
| 6 | 3.44781656 | -1.14592212 | 1.37897701  |
| 1 | 2.53325765 | -0.56779468 | 1.47740152  |
| 6 | 3.98126637 | -1.73799472 | 2.53865292  |
| 6 | 5.18615328 | -2.68261151 | 2.70827568  |
| 6 | 5.13259322 | -2.96812210 | 4.20228489  |
| 6 | 5.93930871 | -3.76731243 | 5.00634380  |
| 1 | 6.77553815 | -4.32786201 | 4.58353425  |
| 6 | 5.65691948 | -3.84819308 | 6.38067158  |
| 1 | 6.27763431 | -4.47292116 | 7.02395301  |
| 6 | 4.58168343 | -3.13704835 | 6.93141867  |
| 1 | 4.37263222 | -3.21469152 | 7.99913926  |
| 6 | 3.76231110 | -2.32689670 | 6.13279586  |
| 1 | 2.92243440 | -1.78713600 | 6.56896068  |
| 6 | 4.06506319 | -2.25909238 | 4.77054052  |
| 6 | 2.25658735 | -0.66843441 | 3.97908485  |
| 1 | 1.35357615 | -1.14654629 | 3.57597328  |
| 1 | 2.13766633 | -0.49700199 | 5.05228584  |
| 1 | 2.40389297 | 0.29526374  | 3.47824019  |
| 6 | 5.01069393 | -3.99129955 | 1.89936943  |
| 1 | 5.02722450 | -3.80323373 | 0.81843104  |
| 1 | 5.83035266 | -4.68340026 | 2.14095119  |
| 1 | 4.06053193 | -4.48383757 | 2.14297931  |
| 6 | 6.52404334 | -1.97620253 | 2.36562397  |
| 1 | 6.63522886 | -1.03984158 | 2.92891227  |
| 1 | 7.36187468 | -2.63680957 | 2.63061555  |

1 6.60258563 -1.74552584 1.29565983  
6 3.60983331 4.56858773 -0.53676481  
6 2.33303535 3.75492791 -0.89749632  
6 1.56127055 4.18301473 -1.99509631  
1 1.86462836 5.07477494 -2.53394646  
6 0.43007135 3.47357306 -2.43243155  
6 -2.06527908 5.32644672 1.34177994  
6 -1.08077559 4.13106873 1.50285742  
6 -0.34393159 4.03996561 2.69786874  
1 -0.45392420 4.82072310 3.44336779  
6 0.50924807 2.95566133 2.96805692  
6 1.20881860 2.94322612 4.35956744

{[Mn(hfac)<sub>2</sub>]<sub>2</sub>(TMI-NPS)<sub>2</sub>} complex, Sz = 4

25 -0.52989856 -1.78199727 -0.27958655  
9 -3.70236703 -5.03448081 -0.88152824  
9 -4.68960883 -3.83379622 0.66321165  
9 -3.80167101 -5.76984870 1.18001101  
9 0.50563859 -3.72029944 4.37331307  
9 0.19759151 -5.70163004 3.49025067  
9 1.88332652 -4.46535977 2.83903290  
9 0.78185521 -6.10495454 -0.86033126  
9 2.32686768 -5.09667551 -2.04217452  
9 0.70338557 -6.16996340 -3.04948937  
9 -2.95442952 -3.72485352 -4.68672919  
9 -1.88758788 -1.91893691 -5.32292181  
9 -3.56803435 -1.76685717 -3.92246455  
8 -1.41207822 -0.07231999 0.32559533  
8 -2.13730109 -2.89514093 -0.02393633  
8 0.11703673 -2.61332491 1.74025605  
8 0.46019452 -3.32311433 -0.96975688  
8 -1.38288707 -1.61091673 -2.34532231  
7 -2.61389794 2.17109543 -3.93734336  
6 0.57653498 -4.43105857 3.20769537  
6 -2.55909072 -0.11067339 1.06193660  
6 -2.49777279 -0.74071203 2.33250290  
1 -1.54508932 -1.17687710 2.63002302

6 -3.58415686 -0.77581716 3.17610072  
1 -3.50434431 -1.26116837 4.15108756  
6 -4.82164673 -0.18670782 2.79653392  
6 -5.94956500 -0.25210207 3.65593196  
1 -5.83862048 -0.75084641 4.62124143  
6 -7.16597817 0.29008550 3.28024958  
1 -8.02808837 0.23327878 3.94612306  
6 -7.28533667 0.89915991 2.01306222  
1 -8.24768140 1.30248177 1.69318544  
6 -6.19496552 0.97723153 1.15728430  
1 -6.35104933 1.41380452 0.17164819  
6 -4.92073065 0.46612861 1.52242953  
6 -3.75436262 0.54432657 0.64182211  
6 -3.86523011 1.35811635 -0.53612320  
1 -4.67748815 2.08080106 -0.48951137  
6 -3.10873729 1.35385108 -1.69852507  
1 -2.33195439 0.60026493 -1.80446782  
6 -3.31789114 2.24649248 -2.77092787  
6 -4.30244171 3.43145404 -2.87364114  
6 -3.96492972 3.99018043 -4.24738297  
6 -4.48007867 5.07765628 -4.94604669  
1 -5.25863407 5.70853782 -4.51223502  
6 -3.97636329 5.35783244 -6.22841256  
1 -4.36744688 6.20856422 -6.78769406  
6 -2.97473563 4.55662894 -6.79510038  
1 -2.59428072 4.79103546 -7.79017965  
6 -2.44833223 3.45711083 -6.10249830  
1 -1.66486616 2.84026662 -6.54192912  
6 -2.96631964 3.20066772 -4.82990618  
6 -1.61322534 1.17795983 -4.30292679  
1 -0.62652187 1.65278061 -4.38853429  
1 -1.88513885 0.73293538 -5.26996550  
1 -1.57493726 0.38663216 -3.55150733  
6 -4.05260453 4.49807553 -1.78086335  
1 -4.30847789 4.12314488 -0.78294226  
1 -4.67457342 5.38179720 -1.98441825  
1 -3.00089157 4.81210258 -1.76688858  
6 -5.77785984 2.94919588 -2.87139380



1 -5.94931573 2.19156536 -3.64798780  
1 -6.43881455 3.80376828 -3.07541659  
1 -6.06760171 2.52269269 -1.90298453  
6 -3.63693143 -4.65586441 0.42067813  
6 -2.30520525 -3.92716973 0.71372547  
6 -1.45428916 -4.43377622 1.69980418  
1 -1.71082802 -5.37585715 2.17384543  
6 -0.29081222 -3.75163012 2.11186660  
6 0.99857601 -5.37726899 -1.98727813  
6 0.17045797 -4.07460072 -1.96762311  
6 -0.77517092 -3.85046971 -2.97260286  
1 -0.95080868 -4.63232587 -3.70548938  
6 -1.49800602 -2.64518637 -3.07137781  
6 -2.49789818 -2.52535009 -4.25144496  
25 0.05283351 1.44771615 0.59931354  
9 3.76861318 3.82224836 2.30047261  
9 4.84321314 2.23382241 1.23804003  
9 4.75305609 4.25232915 0.39116664  
9 1.21130059 3.18223274 -3.99239805  
9 1.81599216 5.07548654 -3.07169606  
9 -0.27769550 4.44212634 -2.99063016  
9 -1.97034463 5.75279816 0.95179767  
9 -3.70255351 4.60800006 1.66161396  
9 -2.43931411 5.69125719 3.08809943  
9 -1.19756729 2.25415987 5.95871172  
9 -0.67046440 0.24976121 5.25679257  
9 0.88680959 1.77591701 5.48440458  
8 1.07581198 -0.64735313 -0.39343278  
8 2.06295311 2.02128893 0.96729152  
8 0.37143914 2.34509648 -1.34039519  
8 -1.15584469 3.18625489 0.97246633  
8 -0.02844420 1.23893542 2.77420071  
7 3.40185593 -1.63044633 3.76094484  
6 1.00324115 4.00235978 -2.91784110  
6 1.98738473 -0.59683943 -1.36880538  
6 1.54073121 -0.43828894 -2.71275124  
1 0.46637591 -0.39238274 -2.87393551  
6 2.41453424 -0.35232574 -3.76947331

1 2.03404547 -0.23336740 -4.78668223  
6 3.82339120 -0.37488733 -3.56177100  
6 4.72265315 -0.21904254 -4.64748179  
1 4.31092793 -0.11281268 -5.65367531  
6 6.09186103 -0.18830225 -4.44148215  
1 6.77652866 -0.06599812 -5.28181545  
6 6.59145375 -0.29197551 -3.12653713  
1 7.66649480 -0.23241527 -2.94776600  
6 5.72838925 -0.45108396 -2.04953712  
1 6.15707833 -0.47490336 -1.04802509  
6 4.32180174 -0.53041423 -2.22709509  
6 3.39400196 -0.72831233 -1.11211747  
6 3.94103364 -1.15208874 0.13607805  
1 4.96470236 -1.51667293 0.06487113  
6 3.35875696 -1.19069855 1.39475573  
1 2.36141080 -0.77952800 1.51806456  
6 3.98892349 -1.71839649 2.53623328  
6 5.33114554 -2.45745815 2.67772820  
6 5.32992349 -2.79141334 4.16309635  
6 6.25817943 -3.47456865 4.94229352  
1 7.16569409 -3.89044897 4.49965308  
6 6.00876189 -3.62680505 6.31713663  
1 6.72473311 -4.16342685 6.94069131  
6 4.84625591 -3.09552352 6.89312916  
1 4.66621329 -3.22219734 7.96152598  
6 3.90383170 -2.40294407 6.12035272  
1 3.00252874 -1.99752173 6.57893089  
6 4.17113189 -2.26575574 4.75505365  
6 2.14812845 -0.92530428 4.01122417  
1 1.34288593 -1.35733306 3.40298195  
1 1.88859253 -1.01502888 5.06889702  
1 2.25628982 0.13573951 3.75192738  
6 5.38042590 -3.74597337 1.82133092  
1 5.35602117 -3.51554490 0.74819773  
1 6.30987280 -4.29412192 2.03359313  
1 4.53266854 -4.40562620 2.04658526  
6 6.53195845 -1.52520464 2.36373516  
1 6.48126316 -0.60012379 2.95349502

|   |             |             |             |
|---|-------------|-------------|-------------|
| 1 | 7.46962872  | -2.04169018 | 2.61465320  |
| 1 | 6.56982329  | -1.25418471 | 1.30100431  |
| 6 | 4.03947238  | 3.31743707  | 1.07041060  |
| 6 | 2.72207453  | 2.90693689  | 0.35220087  |
| 6 | 2.39794851  | 3.55039056  | -0.85538279 |
| 1 | 3.05784035  | 4.32636136  | -1.22956439 |
| 6 | 1.24596085  | 3.22099370  | -1.59304259 |
| 6 | -2.41191723 | 4.95454460  | 1.94801762  |
| 6 | -1.54014862 | 3.66950697  | 2.07341062  |
| 6 | -1.31925947 | 3.17709151  | 3.37146671  |
| 1 | -1.72656336 | 3.72388101  | 4.21610490  |
| 6 | -0.58857213 | 2.00034943  | 3.60994802  |
| 6 | -0.40374808 | 1.57194089  | 5.09660209  |

{[Mn(acac)<sub>2</sub>](TMI-NPS)}<sub>2</sub> dimer, S = 5

|    |             |             |             |
|----|-------------|-------------|-------------|
| 25 | -0.24612247 | -1.65454132 | -0.15772066 |
| 1  | -3.56141541 | -4.85079995 | -0.66286067 |
| 1  | -4.53549557 | -3.77386847 | 0.36224864  |
| 1  | -3.89350247 | -5.29004467 | 1.02354581  |
| 1  | 0.02824411  | -3.27358843 | 4.47764191  |
| 1  | -0.28162268 | -4.95017817 | 3.99900772  |
| 1  | 1.21979172  | -4.14538560 | 3.50182464  |
| 1  | 1.95283348  | -5.80512863 | -0.40405129 |
| 1  | 3.19699955  | -4.87913656 | -1.26779196 |
| 1  | 2.14083372  | -5.98645425 | -2.16048412 |
| 1  | -0.72353199 | -3.70929251 | -5.08636510 |
| 1  | -0.60944690 | -1.94423842 | -5.01433059 |
| 1  | -2.06047189 | -2.76040933 | -4.40920492 |
| 8  | -1.28785377 | 0.23621109  | 0.39343291  |
| 8  | -2.12010277 | -2.69005486 | 0.00994610  |
| 8  | 0.02036716  | -2.39217559 | 1.91017611  |
| 8  | 1.09934029  | -3.31608668 | -0.51651934 |
| 8  | -0.64811990 | -1.88947629 | -2.31451129 |
| 7  | -3.49516979 | 1.49173377  | -3.72955255 |
| 6  | 0.14093301  | -3.99472674 | 3.65468338  |
| 6  | -2.18071508 | 0.32791906  | 1.37313159  |
| 6  | -1.74250908 | 0.06568835  | 2.70828539  |
| 1  | -0.69628941 | -0.19854963 | 2.84244580  |

|   |             |             |             |
|---|-------------|-------------|-------------|
| 6 | -2.58516241 | 0.15579076  | 3.78649266  |
| 1 | -2.20751348 | -0.04521301 | 4.79198492  |
| 6 | -3.96129302 | 0.49478725  | 3.62568651  |
| 6 | -4.82919360 | 0.54049277  | 4.74536062  |
| 1 | -4.41448303 | 0.33129465  | 5.73395316  |
| 6 | -6.17507557 | 0.83243389  | 4.59396641  |
| 1 | -6.83788002 | 0.86420293  | 5.45958268  |
| 6 | -6.68197914 | 1.06652997  | 3.30017130  |
| 1 | -7.74586511 | 1.26738654  | 3.16218547  |
| 6 | -5.84642849 | 1.02879157  | 2.18991451  |
| 1 | -6.30006064 | 1.17001466  | 1.20943585  |
| 6 | -4.45631739 | 0.77044370  | 2.31035741  |
| 6 | -3.54363617 | 0.74154384  | 1.16216284  |
| 6 | -4.03230758 | 1.21217321  | -0.08733331 |
| 1 | -4.98181705 | 1.74083391  | -0.02331872 |
| 6 | -3.47315887 | 1.11387289  | -1.35479370 |
| 1 | -2.55042161 | 0.55264967  | -1.47271791 |
| 6 | -4.04071406 | 1.69523903  | -2.50348202 |
| 6 | -5.26184018 | 2.62212446  | -2.64939058 |
| 6 | -5.24352330 | 2.90433840  | -4.14494234 |
| 6 | -6.07870757 | 3.68952363  | -4.93355482 |
| 1 | -6.91270154 | 4.24045387  | -4.49401285 |
| 6 | -5.82872156 | 3.76840702  | -6.31424140 |
| 1 | -6.47194637 | 4.38234486  | -6.94568635 |
| 6 | -4.75739914 | 3.06845520  | -6.88652099 |
| 1 | -4.57419381 | 3.14347523  | -7.95916659 |
| 6 | -3.90952977 | 2.27243418  | -6.10363199 |
| 1 | -3.07419922 | 1.74024774  | -6.55747890 |
| 6 | -4.17931930 | 2.20720372  | -4.73434625 |
| 6 | -2.33149756 | 0.64324085  | -3.97102878 |
| 1 | -1.43875552 | 1.10072954  | -3.52406014 |
| 1 | -2.18672931 | 0.52680945  | -5.04808895 |
| 1 | -2.48869081 | -0.34455673 | -3.52210668 |
| 6 | -5.08790575 | 3.93368504  | -1.84467341 |
| 1 | -5.07837531 | 3.74495399  | -0.76361586 |
| 1 | -5.92270380 | 4.61371556  | -2.06807192 |
| 1 | -4.15054660 | 4.44004752  | -2.10840632 |
| 6 | -6.58238719 | 1.89771598  | -2.27782659 |

1 -6.69066255 0.95732752 -2.83489894  
1 -7.43474260 2.54485006 -2.52931729  
1 -6.63677918 1.67152647 -1.20542369  
6 -3.66540585 -4.44684028 0.35498145  
6 -2.37988410 -3.66909748 0.76069670  
6 -1.65851549 -4.11906975 1.88336922  
1 -2.00267068 -5.00440456 2.40812515  
6 -0.52772868 -3.43721438 2.36443433  
6 2.16717921 -5.25985711 -1.33503726  
6 1.17676824 -4.07258634 -1.52085513  
6 0.51300326 -3.95447200 -2.75539527  
1 0.67463227 -4.71382864 -3.51348313  
6 -0.33411804 -2.87036946 -3.04537013  
6 -0.96439030 -2.83123143 -4.46911634  
25 0.27955107 1.70538971 0.10799888  
1 3.52686389 4.97831493 0.48074696  
1 4.49651535 3.92419646 -0.57233318  
1 3.79161761 5.41967485 -1.21692369  
1 -0.20938567 3.28751746 -4.52135833  
1 0.09849911 4.97224318 -4.07098694  
1 -1.37155109 4.15454089 -3.50627836  
1 -1.85309940 5.88719656 0.41509147  
1 -3.09904519 4.95874935 1.27314875  
1 -2.02891599 6.04620663 2.17487387  
1 1.06627640 3.87355165 4.93471006  
1 0.81120010 2.12246509 4.96710244  
1 2.29081128 2.78480972 4.25325200  
8 1.33034753 -0.18571331 -0.41213692  
8 2.12500019 2.77510136 -0.13961399  
8 -0.07839360 2.42268033 -1.95629662  
8 -1.06858959 3.35338183 0.51358996  
8 0.76939049 1.95558980 2.24630055  
7 3.41343987 -1.52427164 3.75243228  
6 -0.29796500 4.01513980 -3.70116357  
6 2.24593692 -0.28204230 -1.37076980  
6 1.85441502 0.03947880 -2.70725105  
1 0.82569858 0.35829476 -2.85987672  
6 2.72016827 -0.05971577 -3.76614607

1 2.37875058 0.18729474 -4.77433688  
6 4.07323282 -0.47145873 -3.58244502  
6 4.96292541 -0.53318270 -4.68418626  
1 4.58152183 -0.27769783 -5.67529714  
6 6.28813675 -0.89834684 -4.51232518  
1 6.96799216 -0.94226099 -5.36405762  
6 6.75200296 -1.19292643 -3.21482714  
1 7.80014689 -1.45468356 -3.05955246  
6 5.89475445 -1.13958395 -2.12196313  
1 6.31921932 -1.33498045 -1.13790172  
6 4.52311186 -0.80400304 -2.26380916  
6 3.58605468 -0.75366240 -1.13527174  
6 4.03085301 -1.24854818 0.12139184  
1 4.96716111 -1.80164122 0.07682161  
6 3.44698047 -1.14133323 1.37711787  
1 2.53242156 -0.56320579 1.47554238  
6 3.98043028 -1.73340583 2.53679378  
6 5.18531719 -2.67802262 2.70641654  
6 5.13175713 -2.96353321 4.20042575  
6 5.93847262 -3.76272354 5.00448466  
1 6.77470206 -4.32327312 4.58167511  
6 5.65608339 -3.84360419 6.37881244  
1 6.27679822 -4.46833227 7.02209387  
6 4.58084734 -3.13245946 6.92955953  
1 4.37179613 -3.21010263 7.99728012  
6 3.76147501 -2.32230781 6.13093672  
1 2.92159831 -1.78254711 6.56710154  
6 4.06422710 -2.25450349 4.76868138  
6 2.25575126 -0.66384552 3.97722571  
1 1.35274006 -1.14195740 3.57411414  
1 2.13683024 -0.49241310 5.05042670  
1 2.40305688 0.29985263 3.47638105  
6 5.00985784 -3.98671066 1.89751029  
1 5.02638841 -3.79864484 0.81657190  
1 5.82951657 -4.67881137 2.13909205  
1 4.05969584 -4.47924868 2.14112017  
6 6.52320725 -1.97161364 2.36376483  
1 6.63439277 -1.03525269 2.92705313

|   |             |             |             |
|---|-------------|-------------|-------------|
| 1 | 7.36103859  | -2.63222068 | 2.62875641  |
| 1 | 6.60174954  | -1.74093695 | 1.29380069  |
| 6 | 3.60899722  | 4.57317662  | -0.53862395 |
| 6 | 2.33219926  | 3.75951680  | -0.89935546 |
| 6 | 1.56043446  | 4.18760362  | -1.99695545 |
| 1 | 1.86379227  | 5.07936383  | -2.53580560 |
| 6 | 0.42923526  | 3.47816195  | -2.43429069 |
| 6 | -2.06611517 | 5.33103561  | 1.33992080  |
| 6 | -1.08161168 | 4.13565762  | 1.50099828  |
| 6 | -0.34476768 | 4.04455450  | 2.69600960  |
| 1 | -0.45476029 | 4.82531199  | 3.44150865  |
| 6 | 0.50841198  | 2.96025022  | 2.96619778  |
| 6 | 1.20798251  | 2.94781501  | 4.35770830  |

{[Mn(acac)<sub>2</sub>]<sub>2</sub>(TMI-NPS)<sub>2</sub>} complex, Sz = 4

|    |             |             |             |
|----|-------------|-------------|-------------|
| 25 | -1.68775017 | -2.87484364 | 0.04273997  |
| 1  | -2.10356959 | -7.48204982 | -0.09705737 |
| 1  | -3.65715023 | -7.13297704 | 0.66978200  |
| 1  | -2.30331161 | -7.75822505 | 1.66373584  |
| 1  | -0.93007083 | -2.99809482 | 4.50380867  |
| 1  | -0.42556324 | -4.71671636 | 4.59046985  |
| 1  | 0.63303634  | -3.49481217 | 3.82954657  |
| 1  | 2.06744850  | -5.14076771 | -0.88330136 |
| 1  | 2.68852187  | -3.50296636 | -1.14914148 |
| 1  | 2.34399492  | -4.54911680 | -2.55808116 |
| 1  | -1.34522778 | -2.96969644 | -5.01777507 |
| 1  | -2.16169261 | -1.54154965 | -4.30542594 |
| 1  | -2.94709007 | -3.12184203 | -4.22483580 |
| 8  | -3.22071717 | -1.81737147 | 0.41821263  |
| 8  | -2.39468037 | -4.84667915 | 0.10370131  |
| 8  | -1.17152342 | -2.96113903 | 1.90300020  |
| 8  | 0.10544269  | -3.48552574 | -0.38838315 |
| 8  | -2.01127920 | -2.45847438 | -1.82980953 |
| 7  | -2.81446204 | 2.08638946  | -2.16934128 |
| 6  | -0.41203459 | -3.81076715 | 3.97324367  |
| 6  | -4.21465188 | -1.77845063 | 1.27511327  |
| 6  | -4.46594832 | -2.89353422 | 2.13258692  |
| 1  | -3.80483319 | -3.75505529 | 2.05002237  |

6 -5.51823416 -2.90660173 3.01389132  
1 -5.69373127 -3.78060512 3.64588610  
6 -6.40230258 -1.79087066 3.12591981  
6 -7.47178380 -1.81609859 4.05638865  
1 -7.60162306 -2.71039386 4.67100074  
6 -8.33424383 -0.74005735 4.19369802  
1 -9.15352109 -0.77158729 4.91355773  
6 -8.13014756 0.40113332 3.39289905  
1 -8.79086587 1.26412940 3.49571137  
6 -7.08895189 0.44569551 2.47265385  
1 -6.97052828 1.36069975 1.89343012  
6 -6.19453593 -0.64244545 2.29060322  
6 -5.09237148 -0.62564922 1.31850371  
6 -4.95151015 0.49182255 0.45508867  
1 -5.74547774 1.23223344 0.52901761  
6 -3.93513064 0.77099768 -0.47510791  
1 -3.12471340 0.05129287 -0.55062136  
6 -3.87769958 1.88757981 -1.30717110  
6 -4.87202250 3.05118510 -1.48262043  
6 -4.17309883 3.88725792 -2.54865723  
6 -4.54991748 5.08092109 -3.15400018  
1 -5.49144946 5.56846929 -2.89069493  
6 -3.70038403 5.66036260 -4.11462792  
1 -3.98320959 6.59732455 -4.59596823  
6 -2.48718675 5.04214536 -4.44646649  
1 -1.82647480 5.50705441 -5.18019233  
6 -2.09235459 3.83909860 -3.84298198  
1 -1.13278790 3.38676395 -4.09248641  
6 -2.95802966 3.27144386 -2.89982643  
6 -1.67859239 1.18321964 -2.28461452  
1 -1.01013451 1.26108976 -1.41395495  
1 -1.10750519 1.43688523 -3.18374886  
1 -2.03246152 0.14557073 -2.36659075  
6 -5.03630211 3.88290146 -0.18577265  
1 -5.50195605 3.29595927 0.61682297  
1 -5.67330322 4.75807718 -0.38322017  
1 -4.06267084 4.24224272 0.17352743  
6 -6.24540963 2.55348497 -1.99862338



1 -6.12968785 1.97832148 -2.92737020  
1 -6.90106655 3.41242397 -2.20610990  
1 -6.74263458 1.91064980 -1.25996858  
6 -2.56812086 -7.10244471 0.82531658  
6 -2.13684209 -5.66566331 1.04562166  
6 -1.49725813 -5.31595312 2.26529796  
1 -1.33949787 -6.10972239 2.99345181  
6 -1.06211911 -4.03084738 2.62556465  
6 2.00859140 -4.26967170 -1.55258296  
6 0.60181176 -3.72712468 -1.55424255  
6 -0.07586664 -3.50551713 -2.76654029  
1 0.42277847 -3.77972050 -3.69355159  
6 -1.32945021 -2.87896085 -2.84504204  
6 -1.96904728 -2.61889567 -4.18757021  
25 1.86549217 2.89550128 -0.74160943  
1 4.51822716 4.23958762 2.91127869  
1 4.86447696 2.50889998 2.83043111  
1 6.08984384 3.68602252 2.25514060  
1 5.63105830 3.30203441 -3.38761524  
1 6.63072240 4.30738407 -2.28968330  
1 5.23505574 5.01094396 -3.16866922  
1 0.20410049 7.14655556 -0.96748078  
1 -1.00447550 6.41543149 -2.03280186  
1 -1.46362206 6.86543288 -0.36254878  
1 -2.26341072 3.25323142 2.41809275  
1 -1.87375659 1.60597428 1.82963936  
1 -0.79293634 2.40969626 2.98357413  
8 1.88006834 1.02264990 -1.55640644  
8 3.12243710 3.08187674 0.93191320  
8 3.45297049 3.50791900 -1.89185184  
8 0.77638440 4.58692094 -1.19594595  
8 0.27629178 2.35524447 0.50201332  
7 2.56580835 -0.80193894 2.72067027  
6 5.61190592 4.11723495 -2.64866322  
6 2.67034143 0.49854339 -2.44184389  
6 2.60567834 0.97383127 -3.79785842  
1 1.90362110 1.78472469 -3.99786113  
6 3.39874353 0.46014945 -4.78808191

1 3.32744483 0.84671843 -5.80804845  
6 4.33868596 -0.58666296 -4.52089434  
6 5.13298096 -1.11891156 -5.56557138  
1 5.01688328 -0.70302969 -6.56940295  
6 6.03695049 -2.14519093 -5.33223977  
1 6.64369334 -2.54693507 -6.14495485  
6 6.14929704 -2.67064774 -4.03071185  
1 6.84076680 -3.49198227 -3.83297261  
6 5.37705755 -2.16243569 -2.99095385  
1 5.48125319 -2.62587350 -2.00990924  
6 4.46217671 -1.09531546 -3.18602791  
6 3.64297925 -0.52945633 -2.10788618  
6 3.86372056 -0.95207402 -0.77409399  
1 4.75771254 -1.55673179 -0.62330310  
6 3.08583580 -0.68983291 0.36343155  
1 2.15520094 -0.14931401 0.20996390  
6 3.40743010 -1.07074576 1.66693353  
6 4.65563434 -1.79492260 2.20800912  
6 4.34955232 -1.85193826 3.69871961  
6 5.08373319 -2.37692559 4.75674626  
1 6.06036983 -2.83591522 4.58760306  
6 4.55142227 -2.31027820 6.05707392  
1 5.11684631 -2.71646688 6.89649698  
6 3.29659276 -1.72707580 6.27806864  
1 2.89104141 -1.68507508 7.29014724  
6 2.54442696 -1.19477725 5.22054591  
1 1.56619727 -0.75216758 5.40731353  
6 3.09575738 -1.26379526 3.93577419  
6 1.25781057 -0.16614860 2.59708236  
1 0.51318949 -0.88170520 2.21533829  
1 0.94101942 0.18392003 3.58552625  
1 1.30491901 0.70018687 1.92393966  
6 4.77062832 -3.23596367 1.64693651  
1 4.97576819 -3.23613599 0.56841216  
1 5.59379105 -3.76379770 2.15043432  
1 3.84347095 -3.79957849 1.81866131  
6 5.95202324 -0.98992019 1.94745085  
1 5.87403406 0.02536152 2.35923200

|   |             |             |             |
|---|-------------|-------------|-------------|
| 1 | 6.80438120  | -1.49085253 | 2.42984134  |
| 1 | 6.16452062  | -0.90653302 | 0.87354156  |
| 6 | 5.01650178  | 3.46523109  | 2.30789782  |
| 6 | 4.35848298  | 3.40697787  | 0.93980328  |
| 6 | 5.13291931  | 3.72117880  | -0.20040419 |
| 1 | 6.18059752  | 3.97123423  | -0.04156323 |
| 6 | 4.65458547  | 3.75438814  | -1.52925287 |
| 6 | -0.65793596 | 6.46356769  | -0.98899801 |
| 6 | -0.21052036 | 5.08334881  | -0.55108189 |
| 6 | -0.89180513 | 4.44235190  | 0.50964697  |
| 1 | -1.69440832 | 4.99400826  | 0.99626444  |
| 6 | -0.62494145 | 3.13730985  | 0.97449400  |
| 6 | -1.45155706 | 2.58013669  | 2.11737047  |

{[Mn(hfac)<sub>2</sub>](TMI-NPS)<sub>2</sub>} complex,  $S = 5/2$

|   |             |             |             |
|---|-------------|-------------|-------------|
| 8 | -1.88123572 | -0.82879742 | -0.20978579 |
| 7 | -3.31569442 | 1.47872307  | -4.04551999 |
| 6 | -2.83478868 | -0.87813183 | 0.65759661  |
| 6 | -2.75244099 | -1.84074443 | 1.72743543  |
| 1 | -1.89966725 | -2.51968461 | 1.70469883  |
| 6 | -3.67753285 | -1.88368999 | 2.73315206  |
| 1 | -3.58295309 | -2.61993215 | 3.53577897  |
| 6 | -4.77062004 | -0.95809605 | 2.79054981  |
| 6 | -5.67520657 | -0.98883353 | 3.87880659  |
| 1 | -5.52581679 | -1.73951717 | 4.65846886  |
| 6 | -6.72398823 | -0.08475372 | 3.96628035  |
| 1 | -7.41330138 | -0.11293719 | 4.81114492  |
| 6 | -6.87772313 | 0.87921925  | 2.95211922  |
| 1 | -7.68527740 | 1.61091310  | 3.01510113  |
| 6 | -6.00642864 | 0.91768586  | 1.86813387  |
| 1 | -6.15929125 | 1.69921415  | 1.12427568  |
| 6 | -4.93209786 | 0.00127217  | 1.73937062  |
| 6 | -3.99995428 | -0.00227599 | 0.60472337  |
| 6 | -4.27686186 | 0.80057555  | -0.52207859 |
| 1 | -5.15334201 | 1.44142498  | -0.43803581 |
| 6 | -3.61422295 | 0.80914909  | -1.75503238 |
| 1 | -2.76794923 | 0.13493776  | -1.86410473 |
| 6 | -3.95734063 | 1.61212806  | -2.84428350 |

|    |             |             |             |
|----|-------------|-------------|-------------|
| 6  | -4.99078766 | 2.74749314  | -2.95982917 |
| 6  | -4.78376762 | 3.19631010  | -4.40024403 |
| 6  | -5.40754341 | 4.19708437  | -5.13811748 |
| 1  | -6.18282895 | 4.82285949  | -4.69091188 |
| 6  | -5.02292680 | 4.39704269  | -6.47549871 |
| 1  | -5.50125966 | 5.17959158  | -7.06555155 |
| 6  | -4.02810141 | 3.59806704  | -7.05465409 |
| 1  | -3.73805051 | 3.76395872  | -8.09315313 |
| 6  | -3.39150654 | 2.58518476  | -6.32273228 |
| 1  | -2.61661128 | 1.97446934  | -6.78547835 |
| 6  | -3.78778067 | 2.40522745  | -4.99424183 |
| 6  | -2.29289351 | 0.47349651  | -4.31108848 |
| 1  | -1.49312790 | 0.54128791  | -3.56071524 |
| 1  | -1.86313015 | 0.65044091  | -5.30118069 |
| 1  | -2.73299226 | -0.53489634 | -4.28262409 |
| 6  | -4.67223485 | 3.89929049  | -1.97516370 |
| 1  | -4.77019876 | 3.57236910  | -0.93165894 |
| 1  | -5.36720424 | 4.73495890  | -2.14378112 |
| 1  | -3.64788384 | 4.26800097  | -2.11758943 |
| 6  | -6.44212760 | 2.23271976  | -2.77829348 |
| 1  | -6.65483808 | 1.39952731  | -3.46199049 |
| 1  | -7.14980038 | 3.04468622  | -2.99991639 |
| 1  | -6.62994793 | 1.89124061  | -1.75231853 |
| 25 | 0.01119695  | 0.02179457  | 0.00530392  |
| 9  | 3.49909859  | 2.88669758  | 1.68727593  |
| 9  | 4.70522764  | 1.50377568  | 0.48705417  |
| 9  | 4.31106762  | 3.53225742  | -0.24150845 |
| 9  | 0.69427127  | 1.93614364  | -4.57176789 |
| 9  | 1.44139469  | 3.84139065  | -3.79381384 |
| 9  | -0.65759166 | 3.29322926  | -3.50366917 |
| 9  | -0.90114394 | 4.61516262  | 1.14311330  |
| 9  | -2.88367268 | 3.74758740  | 1.49610131  |
| 9  | -1.60142729 | 4.28049173  | 3.19101990  |
| 9  | 0.15457350  | 0.76066058  | 5.52814660  |
| 9  | -0.44306807 | -1.22763141 | 4.83333990  |
| 9  | 1.61696046  | -0.53409069 | 4.54077718  |
| 8  | 1.03233766  | -1.64255891 | -0.72840425 |
| 8  | 1.92817895  | 0.98785457  | 0.38456918  |

8 0.13359217 1.12743458 -1.91538592  
8 -0.93278913 1.86629607 0.68698039  
8 0.11966300 -0.41495806 2.17827863  
7 2.65490651 -3.37317480 3.32824043  
6 0.61256059 2.80413682 -3.51976359  
6 1.95837113 -1.67693129 -1.62584484  
6 1.58736663 -1.54855208 -3.01283554  
1 0.52003229 -1.48459954 -3.22583447  
6 2.52287643 -1.48175552 -4.00751480  
1 2.21025167 -1.37558478 -5.04972720  
6 3.92748352 -1.51512860 -3.72341761  
6 4.87035464 -1.38245089 -4.77076714  
1 4.50036576 -1.26840624 -5.79244247  
6 6.23380353 -1.38680884 -4.51412567  
1 6.95297086 -1.27925516 -5.32712619  
6 6.67531007 -1.52061097 -3.18425418  
1 7.74389637 -1.50681157 -2.96193890  
6 5.76447767 -1.66455774 -2.14249020  
1 6.16215933 -1.74293512 -1.13098092  
6 4.36477151 -1.67703863 -2.36912250  
6 3.37077640 -1.84149289 -1.30077948  
6 3.79923522 -2.19628670 -0.00397027  
1 4.87783809 -2.25071285 0.13608215  
6 3.00925474 -2.56419909 1.09135693  
1 1.93178469 -2.56302555 0.94403763  
6 3.49869480 -2.92833402 2.34713479  
6 4.93179078 -2.88975976 2.90840242  
6 4.70808777 -3.37096076 4.33580943  
6 5.60578658 -3.55990044 5.38153562  
1 6.66904275 -3.34618610 5.25317060  
6 5.12386281 -4.02938876 6.61596799  
1 5.81538620 -4.17973549 7.44575022  
6 3.76054420 -4.30416141 6.78724368  
1 3.39910788 -4.66714876 7.75043225  
6 2.84462309 -4.11888368 5.74146988  
1 1.78659062 -4.33295513 5.89084049  
6 3.34505249 -3.64923651 4.52357236  
6 1.22152652 -3.56464873 3.13912450

|   |             |             |             |
|---|-------------|-------------|-------------|
| 1 | 1.03683490  | -4.38154439 | 2.42506160  |
| 1 | 0.76206292  | -3.81577724 | 4.09942385  |
| 1 | 0.76449313  | -2.64043009 | 2.75935317  |
| 6 | 5.87414615  | -3.87434361 | 2.16895571  |
| 1 | 6.05570237  | -3.56626300 | 1.13129911  |
| 1 | 6.84389982  | -3.91053691 | 2.68621729  |
| 1 | 5.45559359  | -4.89003018 | 2.15741645  |
| 6 | 5.49934144  | -1.44904899 | 2.89785704  |
| 1 | 4.83473661  | -0.75940454 | 3.43469694  |
| 1 | 6.48333323  | -1.43389075 | 3.38908596  |
| 1 | 5.61765261  | -1.07320487 | 1.87310035  |
| 6 | 3.75782419  | 2.48095777  | 0.41975897  |
| 6 | 2.46603424  | 1.92802219  | -0.25380804 |
| 6 | 2.05740923  | 2.51343299  | -1.46903582 |
| 1 | 2.63519883  | 3.34065045  | -1.86812941 |
| 6 | 0.93363670  | 2.06728065  | -2.18543568 |
| 6 | -1.59355075 | 3.75991483  | 1.93504691  |
| 6 | -0.98806948 | 2.32616833  | 1.85575092  |
| 6 | -0.58965040 | 1.71517056  | 3.06181190  |
| 1 | -0.68878689 | 2.27514443  | 3.98594432  |
| 6 | -0.07119651 | 0.41009269  | 3.11591519  |
| 6 | 0.31581942  | -0.13467605 | 4.52300453  |

{[Mn(hfac)<sub>2</sub>](TMI-NPS)} complex,  $S = 5/2$

|    |             |             |             |
|----|-------------|-------------|-------------|
| 25 | 1.84241487  | -2.36815752 | 0.18325708  |
| 9  | -1.71562494 | -3.33178734 | -3.04266316 |
| 9  | -2.33297501 | -1.56703008 | -1.89839708 |
| 9  | -3.25042690 | -3.51573215 | -1.49219912 |
| 9  | -0.60073258 | -4.20500064 | 3.73234975  |
| 9  | -2.03272027 | -5.38491679 | 2.56514421  |
| 9  | 0.03395475  | -6.07680912 | 2.78307999  |
| 9  | 6.08867801  | -4.21669170 | 1.69610576  |
| 9  | 5.79783056  | -2.28922109 | 2.70004734  |
| 9  | 7.22852178  | -2.46211634 | 1.04833688  |
| 9  | 5.91224668  | -0.39339581 | -2.89213282 |
| 9  | 3.99810968  | 0.66002570  | -2.71565123 |
| 9  | 4.14409132  | -1.15549108 | -3.93551421 |
| 8  | 1.32511984  | -0.60913671 | 1.04476914  |

8 0.16118523 -2.64049981 -1.09859573  
8 0.91951756 -3.82543200 1.38285367  
8 3.72391025 -2.95152553 0.90749317  
8 2.91265879 -1.66006028 -1.49896330  
7 -0.69045786 1.29945103 -2.66613170  
6 -0.73721543 -4.97600329 2.62260238  
6 0.85938481 -0.16586327 2.16633324  
6 1.25663645 -0.79871042 3.39464704  
1 1.93137672 -1.65337710 3.32043882  
6 0.80780346 -0.34943096 4.60675858  
1 1.12450297 -0.85063192 5.52486319  
6 -0.06114135 0.78396027 4.71621034  
6 -0.47095080 1.24782655 5.98944463  
1 -0.12381598 0.71148758 6.87545548  
6 -1.28837603 2.36126630 6.11740791  
1 -1.59778852 2.71289029 7.10232599  
6 -1.70001168 3.04225226 4.95605150  
1 -2.32444660 3.93342674 5.04129686  
6 -1.31008614 2.60072408 3.69558699  
1 -1.62943263 3.18404851 2.83192268  
6 -0.49750087 1.45149620 3.52655989  
6 -0.07986312 0.94327738 2.21588856  
6 -0.66211125 1.48138997 1.04303903  
1 -1.47076049 2.19179074 1.21457846  
6 -0.36192294 1.18444105 -0.29005400  
1 0.46409912 0.50330765 -0.47031150  
6 -1.05757315 1.66743674 -1.40544530  
6 -2.27431911 2.60479147 -1.49447677  
6 -2.49579705 2.66626607 -2.99907548  
6 -3.44816685 3.34694286 -3.75099744  
1 -4.20674439 3.96686704 -3.26859468  
6 -3.42254495 3.22354814 -5.15083962  
1 -4.16298708 3.74994201 -5.75406927  
6 -2.45409772 2.42737699 -5.77719072  
1 -2.44766625 2.33880154 -6.86433676  
6 -1.48828630 1.73648822 -5.03146511  
1 -0.74385192 1.11784561 -5.53188862  
6 -1.53119655 1.87488646 -3.64136686

|   |             |             |             |
|---|-------------|-------------|-------------|
| 6 | 0.43291166  | 0.41276003  | -2.96728955 |
| 1 | 1.36430705  | 0.82950053  | -2.56183564 |
| 1 | 0.53211936  | 0.31459285  | -4.05185348 |
| 1 | 0.27239676  | -0.58258887 | -2.52986405 |
| 6 | -1.94493758 | 4.01620447  | -0.94565810 |
| 1 | -1.74515270 | 3.99440895  | 0.13365598  |
| 1 | -2.79746677 | 4.68785680  | -1.12156386 |
| 1 | -1.06522826 | 4.44086396  | -1.44799059 |
| 6 | -3.51651623 | 2.00192204  | -0.79175941 |
| 1 | -3.73972944 | 0.99683695  | -1.17363274 |
| 1 | -4.39124938 | 2.64135015  | -0.97926300 |
| 1 | -3.37029452 | 1.93144770  | 0.29407882  |
| 6 | -2.08104816 | -2.90752427 | -1.80899611 |
| 6 | -0.94552794 | -3.17034818 | -0.78088790 |
| 6 | -1.25360277 | -3.92388738 | 0.36389509  |
| 1 | -2.26150166 | -4.30577366 | 0.49070042  |
| 6 | -0.29398086 | -4.17997896 | 1.36237066  |
| 6 | 6.01493589  | -2.87958729 | 1.49678830  |
| 6 | 4.85483092  | -2.53893065 | 0.51940251  |
| 6 | 5.15746546  | -1.81390245 | -0.64892112 |
| 1 | 6.18686345  | -1.53002433 | -0.84298148 |
| 6 | 4.15674707  | -1.42637094 | -1.55551514 |
| 6 | 4.57320858  | -0.57606195 | -2.78736770 |

[Mn(hfac)<sub>2</sub>] complex,  $S = 5/2$

|    |             |             |             |
|----|-------------|-------------|-------------|
| 25 | -0.00548853 | 0.01463543  | -0.00324962 |
| 9  | -4.35934684 | 1.84699471  | 0.42480581  |
| 9  | -3.19566839 | 2.93902146  | 1.92941803  |
| 9  | -4.56864064 | 1.34752118  | 2.54795585  |
| 9  | -0.44580177 | -2.70101806 | 3.85793831  |
| 9  | -2.63470722 | -2.61700283 | 3.90551332  |
| 9  | -1.61860529 | -3.77633087 | 2.34856047  |
| 9  | 4.58099911  | 1.11114310  | 0.45362269  |
| 9  | 3.68381842  | 2.99190200  | -0.23050121 |
| 9  | 4.83699858  | 1.75592520  | -1.62465162 |
| 9  | 2.39322186  | -0.52538394 | -4.80612108 |
| 9  | 0.21920992  | -0.26219102 | -4.73344958 |
| 9  | 1.11939563  | -2.14847893 | -4.06878714 |



|   |             |             |             |
|---|-------------|-------------|-------------|
| 8 | -1.67617670 | 1.05281345  | 0.53261809  |
| 8 | -0.47301880 | -1.41210081 | 1.37768036  |
| 8 | 1.82577983  | 0.91113707  | 0.02869643  |
| 8 | 0.30861445  | -0.51314090 | -1.94794326 |
| 6 | -1.55544414 | -2.64336648 | 3.08567997  |
| 6 | -3.68468959 | 1.72342885  | 1.59146956  |
| 6 | -2.51702915 | 0.71108220  | 1.42261727  |
| 6 | -2.49957496 | -0.43736302 | 2.23257501  |
| 1 | -3.30079456 | -0.58236642 | 2.95044789  |
| 6 | -1.48433812 | -1.40567446 | 2.14754367  |
| 6 | 3.96488913  | 1.71712299  | -0.58760415 |
| 6 | 2.65071055  | 0.96362704  | -0.93695066 |
| 6 | 2.50184605  | 0.43449670  | -2.23049071 |
| 1 | 3.30818993  | 0.56715866  | -2.94500073 |
| 6 | 1.34786553  | -0.25888829 | -2.63421076 |
| 6 | 1.27778569  | -0.80470400 | -4.08818221 |

[Mn(hfac)<sub>2</sub>]<sup>-</sup>, complex charge= -1, S = 2

|    |             |             |             |
|----|-------------|-------------|-------------|
| 25 | 0.01375522  | -0.03252022 | 0.00875487  |
| 9  | -4.32666974 | 1.87038868  | 0.38873241  |
| 9  | -3.16626504 | 2.95601580  | 1.89327624  |
| 9  | -4.53432598 | 1.35728762  | 2.51057235  |
| 9  | -0.46354860 | -2.72466683 | 3.89425864  |
| 9  | -2.65230119 | -2.59291047 | 3.90653498  |
| 9  | -1.63074684 | -3.80360373 | 2.39036197  |
| 9  | 4.60531226  | 1.13687921  | 0.45061686  |
| 9  | 3.65823286  | 3.00148423  | -0.19339266 |
| 9  | 4.79194197  | 1.79592545  | -1.63230685 |
| 9  | 2.36513094  | -0.47837594 | -4.80142087 |
| 9  | 0.18425889  | -0.25963891 | -4.72893439 |
| 9  | 1.11416553  | -2.14218222 | -4.11261313 |
| 8  | -1.62466037 | 1.05595694  | 0.48555434  |
| 8  | -0.42770409 | -1.45821544 | 1.37235160  |
| 8  | 1.81774137  | 0.87893856  | 0.09126905  |
| 8  | 0.27417934  | -0.56779656 | -1.92435332 |
| 6  | -1.55996718 | -2.62720577 | 3.08355193  |
| 6  | -3.62576996 | 1.71447729  | 1.55212120  |
| 6  | -2.47775839 | 0.71313487  | 1.38913595  |

|   |             |             |             |
|---|-------------|-------------|-------------|
| 6 | -2.46153575 | -0.43483297 | 2.20260735  |
| 1 | -3.26793839 | -0.56628481 | 2.91808823  |
| 6 | -1.46133267 | -1.42245557 | 2.14251238  |
| 6 | 3.92054973  | 1.71677139  | -0.58073228 |
| 6 | 2.63302361  | 0.95265107  | -0.90476219 |
| 6 | 2.46431034  | 0.43168100  | -2.20083940 |
| 1 | 3.25992987  | 0.58912952  | -2.92312219 |
| 6 | 1.32198645  | -0.27659664 | -2.61688455 |
| 6 | 1.25600581  | -0.78343555 | -4.06093852 |

[Mn(acac)<sub>2</sub>] complex,  $S = 5/2$

|    |             |             |             |
|----|-------------|-------------|-------------|
| 25 | 0.00010254  | -0.02011062 | 0.00502339  |
| 1  | -1.02655325 | 1.96097469  | -4.03576770 |
| 6  | -1.93656250 | 1.61691081  | -3.52158868 |
| 1  | -2.38618400 | 2.50028116  | -3.04352474 |
| 1  | -2.63760722 | 1.20559672  | -4.25748303 |
| 1  | -2.79609372 | -0.90050623 | -3.31090774 |
| 6  | -2.11003079 | -0.68311745 | -2.49412126 |
| 6  | -1.55339525 | 0.61513170  | -2.45242118 |
| 8  | -0.72820369 | 1.04313594  | -1.56720525 |
| 8  | -1.08083948 | -1.64545570 | -0.55466986 |
| 6  | -1.85759033 | -1.72506140 | -1.57384666 |
| 6  | -2.53841730 | -3.06367424 | -1.76835059 |
| 1  | -1.77151082 | -3.84217026 | -1.89960662 |
| 1  | -3.21618609 | -3.07354028 | -2.63018174 |
| 1  | -3.09985988 | -3.31851662 | -0.85714288 |
| 8  | 2.00921684  | -0.17992573 | 0.26000686  |
| 8  | -0.20802918 | 0.72908112  | 1.88304209  |
| 1  | 4.56604832  | 0.52440657  | 0.37976367  |
| 6  | 4.16677271  | -0.05188633 | 1.22803617  |
| 1  | 4.37163882  | -1.11235975 | 1.01734281  |
| 1  | 4.68726673  | 0.24436711  | 2.14644618  |
| 6  | 2.66905504  | 0.15757102  | 1.30827493  |
| 6  | 2.11050082  | 0.69147352  | 2.49118006  |
| 1  | 2.79972278  | 0.92608949  | 3.30051955  |
| 6  | 0.73940731  | 0.94356399  | 2.72223203  |
| 6  | 0.30853101  | 1.50940574  | 4.05913292  |

|   |             |            |            |
|---|-------------|------------|------------|
| 1 | -0.24756450 | 2.44434594 | 3.89435703 |
| 1 | -0.38726387 | 0.80504268 | 4.54001695 |
| 1 | 1.15362894  | 1.69894638 | 4.73144328 |

[Mn(acac)<sub>2</sub>]<sup>-</sup> complex charge=-1, complex *S* = 2

|    |             |             |             |
|----|-------------|-------------|-------------|
| 25 | 0.00114008  | 0.00099669  | 0.00153365  |
| 1  | -4.21069054 | 1.83381326  | 0.63117945  |
| 1  | -3.27830038 | 2.70663000  | 1.85543162  |
| 1  | -4.37046871 | 1.37709903  | 2.35698457  |
| 1  | -0.66293767 | -2.68649224 | 3.72288028  |
| 1  | -2.45187559 | -2.57798728 | 3.72770321  |
| 1  | -1.59420011 | -3.56365081 | 2.50084541  |
| 1  | 4.46583470  | 1.22597896  | 0.25196728  |
| 1  | 3.73022376  | 2.74440609  | -0.28023975 |
| 1  | 4.62828952  | 1.73588405  | -1.45858593 |
| 1  | 2.19155473  | -0.54448862 | -4.63077124 |
| 1  | 0.40862338  | -0.36413657 | -4.60418889 |
| 1  | 1.14012963  | -1.88653215 | -4.07769624 |
| 8  | -1.64475179 | 1.08105561  | 0.48728984  |
| 8  | -0.42068256 | -1.44239623 | 1.36179824  |
| 8  | 1.81180604  | 0.90934165  | 0.08964244  |
| 8  | 0.25724354  | -0.54609787 | -1.93424612 |
| 6  | -1.56142008 | -2.62679010 | 3.08403986  |
| 6  | -3.66395210 | 1.70884602  | 1.58214801  |
| 6  | -2.50901976 | 0.73878456  | 1.39401393  |
| 6  | -2.45028260 | -0.43051638 | 2.18788809  |
| 1  | -3.25850101 | -0.57289674 | 2.90819112  |
| 6  | -1.45485472 | -1.43475178 | 2.14709433  |
| 6  | 3.94776174  | 1.70875614  | -0.59502711 |
| 6  | 2.65198397  | 0.97448838  | -0.89835103 |
| 6  | 2.45023296  | 0.42956012  | -2.18804586 |
| 1  | 3.25734199  | 0.57108096  | -2.90976250 |
| 6  | 1.31297800  | -0.27897125 | -2.64153760 |
| 6  | 1.27679360  | -0.79101350 | -4.07217908 |

{[Mn(hfac)<sub>2</sub>][Zn(hfac)<sub>2</sub>](TMI-NPS)<sub>2</sub>} complex *S* = 5/2

|    |             |             |             |
|----|-------------|-------------|-------------|
| 25 | -0.32929568 | -1.62807502 | -0.21819118 |
| 9  | -3.53935965 | -4.89127416 | -1.35530904 |

9 -4.77562423 -3.77726009 0.07287163  
9 -3.91736012 -5.71139748 0.64124659  
9 -0.03065138 -3.62289141 4.42255357  
9 -0.38940292 -5.61670118 3.58993540  
9 1.44419972 -4.53634144 3.08055920  
9 1.44965383 -5.99853061 -0.55778636  
9 3.08490026 -4.94129733 -1.56638961  
9 1.65129191 -6.11496362 -2.73630362  
9 -1.53209028 -3.76975214 -5.13448902  
9 -0.79052487 -1.71624237 -5.31900198  
9 -2.69400848 -2.11394706 -4.30277881  
8 -1.39725516 0.20676230 0.32235477  
8 -2.18220861 -2.73192743 -0.17154536  
8 -0.06483533 -2.58688190 1.76824085  
8 1.00461503 -3.23443035 -0.77982289  
8 -0.78077758 -1.65721243 -2.39230665  
7 -2.87731101 2.05724907 -3.93403667  
6 0.11104936 -4.39117304 3.30148613  
6 -2.44139008 0.20814104 1.14680969  
6 -2.26886592 -0.33235956 2.45768060  
1 -1.28561212 -0.72476154 2.70979387  
6 -3.28597106 -0.34503306 3.37853118  
1 -3.11312134 -0.75948548 4.37475621  
6 -4.57889058 0.16718717 3.06513323  
6 -5.62323565 0.12045401 4.02284459  
1 -5.40658350 -0.29885934 5.00784443  
6 -6.89199676 0.58526998 3.71892094  
1 -7.69130555 0.54562564 4.45992980  
6 -7.14183244 1.09360125 2.42840660  
1 -8.14307465 1.44001591 2.16624460  
6 -6.13194517 1.14741853 1.47527123  
1 -6.39457676 1.51090454 0.48250262  
6 -4.81120652 0.71273301 1.76070574  
6 -3.71670777 0.76597748 0.78621811  
6 -3.95297350 1.43356824 -0.44892921  
1 -4.86129820 2.03234273 -0.46439390  
6 -3.20653164 1.42585687 -1.61897533  
1 -2.31514866 0.80621721 -1.65709048

6 -3.55117456 2.17506540 -2.76044556  
6 -4.65612077 3.23979920 -2.93299392  
6 -4.40657942 3.70515299 -4.35951854  
6 -5.04339704 4.67119811 -5.13268880  
1 -5.87063479 5.25969041 -4.73083702  
6 -4.59795681 4.88416583 -6.44874773  
1 -5.08296513 5.64097915 -7.06638512  
6 -3.53446844 4.13732443 -6.97508436  
1 -3.20032129 4.31957261 -7.99726957  
6 -2.88665160 3.15889539 -6.20738599  
1 -2.05429228 2.58640250 -6.61559042  
6 -3.34917838 2.96683844 -4.90350980  
6 -1.79567071 1.12568645 -4.23355915  
1 -0.83639791 1.65867142 -4.27118372  
1 -1.98869869 0.66442455 -5.21046562  
1 -1.74880395 0.33470045 -3.48051101  
6 -4.49267076 4.41457623 -1.93891150  
1 -4.65320010 4.09449909 -0.90194748  
1 -5.22869904 5.19696480 -2.17440264  
1 -3.48956215 4.85456400 -2.00656654  
6 -6.07288259 2.61043946 -2.84840687  
1 -6.17432517 1.76496620 -3.54223294  
1 -6.82158614 3.36813518 -3.12014452  
1 -6.30564488 2.25502263 -1.83689380  
6 -3.67580223 -4.56245620 -0.04505321  
6 -2.41450586 -3.80007816 0.45569215  
6 -1.68255532 -4.35547889 1.52299134  
1 -1.99723929 -5.30835015 1.93596124  
6 -0.57687473 -3.69861754 2.08897486  
6 1.77275455 -5.28586255 -1.66736696  
6 0.89104792 -4.00749104 -1.76890969  
6 0.08860602 -3.84282230 -2.91286079  
1 0.07619379 -4.62585528 -3.66420854  
6 -0.66987893 -2.67828111 -3.12891798  
6 -1.43718658 -2.58712241 -4.48077427  
30 0.18221138 1.62298071 0.49623388  
9 3.53240308 4.54482532 2.03506796  
9 4.75912856 3.21004078 0.80141443

9 4.23669905 5.20831171 0.06984776  
9 0.71169919 3.48124652 -4.10814801  
9 1.06963512 5.45977783 -3.24053833  
9 -0.89778124 4.52410418 -3.04427119  
9 -1.80326217 5.90664744 0.92174795  
9 -3.51686191 4.68553604 1.54022196  
9 -2.33702486 5.76292316 3.04011032  
9 -0.24851992 2.82401548 5.85094679  
9 -0.13445069 0.70862238 5.30349753  
9 1.63055698 1.99543823 5.09725645  
8 1.27301833 -0.19897587 -0.20898818  
8 2.04309913 2.52457906 0.78649781  
8 0.17115202 2.53941212 -1.44566743  
8 -1.12324672 3.24447802 0.87401690  
8 0.29686891 1.41189252 2.64309119  
7 3.29259919 -1.95812637 3.80207029  
6 0.43805386 4.28093681 -3.03034573  
6 2.19424760 -0.18147000 -1.16146294  
6 1.79774085 0.18797748 -2.48569252  
1 0.75165821 0.44336661 -2.63261989  
6 2.67963133 0.20968123 -3.53561271  
1 2.33316256 0.48884351 -4.53383326  
6 4.05841726 -0.10853139 -3.35475493  
6 4.96878012 -0.02958949 -4.43808061  
1 4.58656287 0.25903187 -5.41982531  
6 6.31609242 -0.29974138 -4.25923188  
1 7.01178025 -0.23457455 -5.09674908  
6 6.78096085 -0.63795292 -2.97253922  
1 7.84470903 -0.82085558 -2.81045017  
6 5.90302143 -0.72494741 -1.89822504  
1 6.32131276 -0.94003720 -0.91526052  
6 4.51168798 -0.49269323 -2.05208752  
6 3.55666864 -0.59496616 -0.94487946  
6 4.00086501 -1.20381771 0.26057317  
1 4.95550695 -1.72015736 0.17237429  
6 3.38525827 -1.26114446 1.50375112  
1 2.45958564 -0.71050857 1.64985507  
6 3.89735513 -1.99676795 2.58852308

|   |             |             |             |
|---|-------------|-------------|-------------|
| 6 | 5.10851386  | -2.94488037 | 2.66461156  |
| 6 | 5.02301022  | -3.41979085 | 4.10813559  |
| 6 | 5.82259600  | -4.30546707 | 4.82383684  |
| 1 | 6.67490490  | -4.79975485 | 4.35316869  |
| 6 | 5.51255763  | -4.56075898 | 6.17052965  |
| 1 | 6.12751877  | -5.25481897 | 6.74455172  |
| 6 | 4.41811656  | -3.93339864 | 6.78192821  |
| 1 | 4.18916952  | -4.14404066 | 7.82738778  |
| 6 | 3.60537123  | -3.03803267 | 6.07262746  |
| 1 | 2.75355725  | -2.56109818 | 6.55622984  |
| 6 | 3.93346740  | -2.79916062 | 4.73572817  |
| 6 | 2.11976980  | -1.13882670 | 4.09638609  |
| 1 | 1.27508055  | -1.45855414 | 3.47223130  |
| 1 | 1.85742029  | -1.24924614 | 5.15131237  |
| 1 | 2.33984855  | -0.08499340 | 3.88804088  |
| 6 | 4.96519123  | -4.13859490 | 1.68812315  |
| 1 | 5.00142055  | -3.80933845 | 0.64165566  |
| 1 | 5.78786686  | -4.84898407 | 1.85478017  |
| 1 | 4.01623044  | -4.66753667 | 1.84407467  |
| 6 | 6.44660110  | -2.19044453 | 2.44910505  |
| 1 | 6.53274363  | -1.33153717 | 3.12827055  |
| 1 | 7.28522536  | -2.87197227 | 2.65117315  |
| 1 | 6.55027882  | -1.82702234 | 1.41891691  |
| 6 | 3.76784032  | 4.13689806  | 0.76292276  |
| 6 | 2.47908047  | 3.51855883  | 0.14485774  |
| 6 | 1.95852453  | 4.10524917  | -1.02304195 |
| 1 | 2.44267314  | 4.99072028  | -1.42171174 |
| 6 | 0.85974474  | 3.56361601  | -1.71279304 |
| 6 | -2.25049271 | 5.06146836  | 1.88098375  |
| 6 | -1.33520126 | 3.80460333  | 1.98213318  |
| 6 | -0.88353696 | 3.42612675  | 3.25818788  |
| 1 | -1.15139759 | 4.04201535  | 4.11028625  |
| 6 | -0.11862676 | 2.26642409  | 3.47397813  |
| 6 | 0.27853549  | 1.95891484  | 4.95022062  |

{[Mn(hfac)<sub>2</sub>] [Zn(hfac)<sub>2</sub>][(TMI-NPS)<sub>2</sub>] } complex  $S = 3/2$

|    |             |             |             |
|----|-------------|-------------|-------------|
| 25 | -0.38330251 | -1.74457057 | -0.30685854 |
| 9  | -3.65856949 | -4.85562852 | -0.99398209 |

9 -4.61106289 -3.60390483 0.53093397  
9 -3.81756259 -5.57497210 1.07007253  
9 0.50893226 -3.57881197 4.32712996  
9 0.10799297 -5.58180200 3.53374513  
9 1.87001276 -4.46972213 2.85821631  
9 0.78190921 -6.12357487 -0.96322891  
9 2.35631289 -5.16521387 -2.14914131  
9 0.68878200 -6.17155552 -3.15199749  
9 -2.90051853 -3.61150790 -4.72907617  
9 -1.76327256 -1.86311402 -5.40173429  
9 -3.42480011 -1.61937872 -3.98993343  
8 -1.38610029 -0.05536987 0.28048633  
8 -1.99333116 -2.80294322 -0.14317535  
8 0.22335297 -2.58189298 1.63810901  
8 0.56828671 -3.32983631 -1.05497231  
8 -1.21906366 -1.53508221 -2.43345473  
7 -2.66608459 2.18117449 -3.95806290  
6 0.55935365 -4.34815164 3.19712029  
6 -2.51255996 -0.07865245 1.04929965  
6 -2.44434691 -0.75182293 2.29600321  
1 -1.49851256 -1.21950068 2.56320180  
6 -3.50971768 -0.77225444 3.16609566  
1 -3.42038006 -1.28321073 4.12704703  
6 -4.73471507 -0.13115898 2.83639501  
6 -5.83602797 -0.17585886 3.73141376  
1 -5.71254976 -0.70444410 4.67913090  
6 -7.04077403 0.42427710 3.41226053  
1 -7.88264903 0.38353649 4.10462572  
6 -7.17350051 1.07532278 2.16774209  
1 -8.12643220 1.53045625 1.89229217  
6 -6.10953237 1.13296214 1.27776545  
1 -6.28286071 1.61386207 0.31636625  
6 -4.84666221 0.55698214 1.58152942  
6 -3.70229907 0.60789129 0.66647101  
6 -3.83861213 1.39511614 -0.52557817  
1 -4.67195916 2.09273900 -0.49321631  
6 -3.09201119 1.39342792 -1.69439697  
1 -2.27822262 0.67873851 -1.79029240



6 -3.35794471 2.24962267 -2.78404956  
6 -4.40225482 3.38185758 -2.90089431  
6 -4.11427633 3.91934618 -4.29447171  
6 -4.69456914 4.96029445 -5.01256951  
1 -5.49913720 5.56094407 -4.58341115  
6 -4.22358981 5.23283020 -6.30899075  
1 -4.66609321 6.04719077 -6.88386177  
6 -3.18901908 4.47016939 -6.86955703  
1 -2.83463748 4.69781274 -7.87577884  
6 -2.59665648 3.41781995 -6.15711202  
1 -1.78798030 2.83142208 -6.59253367  
6 -3.08381634 3.16720697 -4.87110785  
6 -1.61706992 1.23452201 -4.31291472  
1 -0.65348896 1.75361352 -4.39834643  
1 -1.86328438 0.77551686 -5.27994588  
1 -1.54417473 0.44675917 -3.55968819  
6 -4.18626513 4.49100211 -1.84297161  
1 -4.38984422 4.13045478 -0.82772006  
1 -4.86559333 5.33053908 -2.05070980  
1 -3.15579467 4.86837226 -1.87029173  
6 -5.85225319 2.82938829 -2.86036068  
1 -5.99387167 2.03105664 -3.60128069  
1 -6.55671455 3.64107447 -3.09219506  
1 -6.11131491 2.43082664 -1.87166028  
6 -3.59071022 -4.47380771 0.30803511  
6 -2.23549294 -3.80983169 0.61918732  
6 -1.43646919 -4.32283380 1.64368959  
1 -1.75146534 -5.23307604 2.14418956  
6 -0.25024525 -3.68482075 2.05625739  
6 1.02053891 -5.39834352 -2.08590860  
6 0.24056977 -4.06066599 -2.04787608  
6 -0.70596887 -3.80260401 -3.04366739  
1 -0.91892499 -4.57813738 -3.77328591  
6 -1.38088133 -2.56804502 -3.14150619  
6 -2.38969864 -2.42605262 -4.31809938  
30 -0.10117378 1.49547617 0.67578651  
9 3.55274103 3.74650228 2.46207904  
9 4.62090506 2.12509102 1.44443401

9 4.58447699 4.13215290 0.56831174  
9 1.21348975 3.14939115 -3.86607507  
9 1.67566171 5.05202766 -2.88564072  
9 -0.38912092 4.33087003 -2.94683247  
9 -1.92723992 5.80734018 1.04426264  
9 -3.71780779 4.67785097 1.61909332  
9 -2.51068041 5.67928314 3.14950456  
9 -1.24038382 2.24712622 5.98552658  
9 -0.72242707 0.23769045 5.29077269  
9 0.83550765 1.76834306 5.47421670  
8 1.22656184 -0.70210472 -0.43139994  
8 1.85810913 1.94062455 1.10748688  
8 0.21526392 2.27871606 -1.24843780  
8 -1.25249434 3.18967482 0.99208523  
8 -0.17453806 1.17921620 2.79028686  
7 3.44503924 -1.60032922 3.72458184  
6 0.90136519 3.94401702 -2.79877229  
6 2.12644188 -0.61757905 -1.40323555  
6 1.68518672 -0.36648872 -2.73699393  
1 0.61416822 -0.26021627 -2.89106914  
6 2.56149012 -0.27201053 -3.78994934  
1 2.18661568 -0.08397740 -4.79886990  
6 3.96826099 -0.38197406 -3.59113164  
6 4.86948940 -0.23368768 -4.67600570  
1 4.45924714 -0.06398963 -5.67414635  
6 6.23952359 -0.29046112 -4.47983092  
1 6.92552673 -0.17489647 -5.32003712  
6 6.73896410 -0.47639529 -3.17411604  
1 7.81660000 -0.49012581 -3.00158154  
6 5.87374044 -0.62587442 -2.09747673  
1 6.30643182 -0.71730053 -1.10169809  
6 4.46374765 -0.61688283 -2.26680398  
6 3.53135328 -0.80213639 -1.15459544  
6 4.05745277 -1.24929348 0.09386060  
1 5.06350963 -1.66228484 0.03317176  
6 3.46297810 -1.23069182 1.34795657  
1 2.48734153 -0.76373336 1.44500047  
6 4.04882455 -1.75329868 2.51351706

|   |             |             |             |
|---|-------------|-------------|-------------|
| 6 | 5.35370259  | -2.54556583 | 2.70191702  |
| 6 | 5.31397325  | -2.83004966 | 4.19707655  |
| 6 | 6.19853737  | -3.52725187 | 5.01371009  |
| 1 | 7.09303319  | -3.99761624 | 4.60000185  |
| 6 | 5.92189626  | -3.62204159 | 6.38854017  |
| 1 | 6.60353194  | -4.16861691 | 7.04125761  |
| 6 | 4.77595702  | -3.02033797 | 6.92719033  |
| 1 | 4.57434822  | -3.10256615 | 7.99610310  |
| 6 | 3.87722946  | -2.31319223 | 6.11642070  |
| 1 | 2.98859602  | -1.85236800 | 6.54652814  |
| 6 | 4.17047272  | -2.23417306 | 4.75176600  |
| 6 | 2.21767845  | -0.83535763 | 3.92911856  |
| 1 | 1.41124520  | -1.24176792 | 3.30550759  |
| 1 | 1.92580774  | -0.89691063 | 4.98038795  |
| 1 | 2.38025431  | 0.21587785  | 3.65708894  |
| 6 | 5.36100409  | -3.86079456 | 1.88596538  |
| 1 | 5.36259710  | -3.66179565 | 0.80621687  |
| 1 | 6.26311505  | -4.44068816 | 2.12964073  |
| 1 | 4.48278104  | -4.47703917 | 2.11665643  |
| 6 | 6.59832199  | -1.67637088 | 2.37790457  |
| 1 | 6.57926968  | -0.73134489 | 2.93719477  |
| 1 | 7.50921549  | -2.22396003 | 2.65966465  |
| 1 | 6.66256327  | -1.44242445 | 1.30754192  |
| 6 | 3.84251391  | 3.21908352  | 1.24527559  |
| 6 | 2.53016544  | 2.82744278  | 0.50569912  |
| 6 | 2.22709817  | 3.48535915  | -0.69702988 |
| 1 | 2.89631420  | 4.26247266  | -1.05147158 |
| 6 | 1.09644763  | 3.15718175  | -1.46691457 |
| 6 | -2.43876554 | 4.98404313  | 1.98626242  |
| 6 | -1.60162489 | 3.67609446  | 2.10572937  |
| 6 | -1.36867812 | 3.17906112  | 3.39766086  |
| 1 | -1.73834485 | 3.74247037  | 4.24849355  |
| 6 | -0.67655846 | 1.97606700  | 3.62788360  |
| 6 | -0.46239790 | 1.55744384  | 5.11483229  |
